# Supplementary material
Source: Royal Society of Chemistry journal article supplement (doi:10.1039/d6el00013d)
Supplement: d6el00013d1.pdf [file d6el00013d1.pdf]

## Supporting Information

### **Organic solar cells: Evolution of the morphological and electronic properties as a function of steric hindrance from the acceptor side groups**

Ailing Yin,<sup>a</sup> Ziwen Yu,<sup>a</sup> Jingyi Ren,<sup>a</sup> Jiacong Feng,<sup>a</sup> Gao-Feng Han,<sup>a</sup> Xing-You

Lang,<sup>a</sup> Jean-Luc Brédas,<sup>b\*</sup> Tonghui Wang,<sup>a\*</sup> Qing Jiang<sup>a\*</sup>

a. Key Laboratory of Automobile Materials, Ministry of Education, and School of Materials Science and Engineering, Jilin University, Changchun 130022, China

b. Department of Chemistry and Biochemistry, The University of Arizona, Tucson, Arizona 85721-0041, United States

\* Correspondence to: [twang@jlu.edu.cn](mailto:twang@jlu.edu.cn); [jlbredas@arizona.edu](mailto:jlbredas@arizona.edu); [jiangq@jlu.edu.cn](mailto:jiangq@jlu.edu.cn)

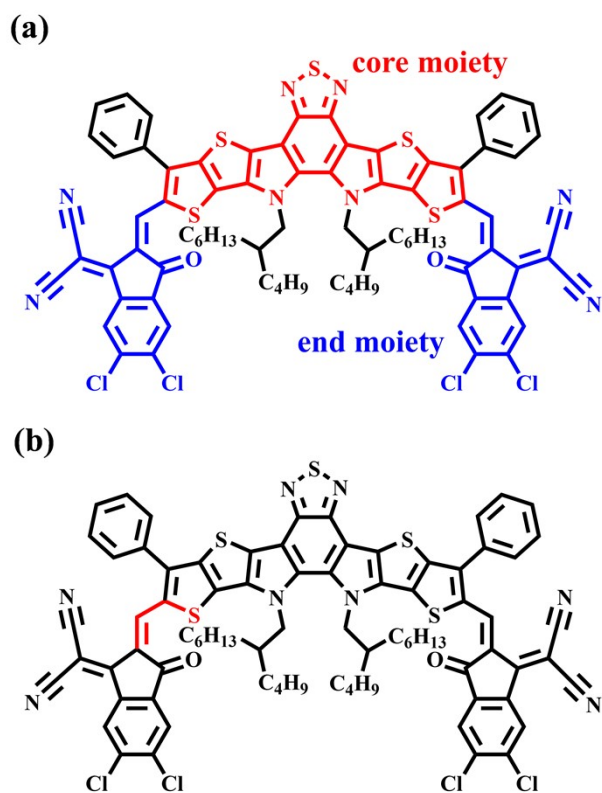

**Figure S1.** Illustrations of (a) the acceptor end and core moieties; and (b) the S-C-C-C dihedral angle used to evaluate the evolution of potential energies by rotating the end moiety with respect to the core moiety. Here, BTP-B is taken as an example.

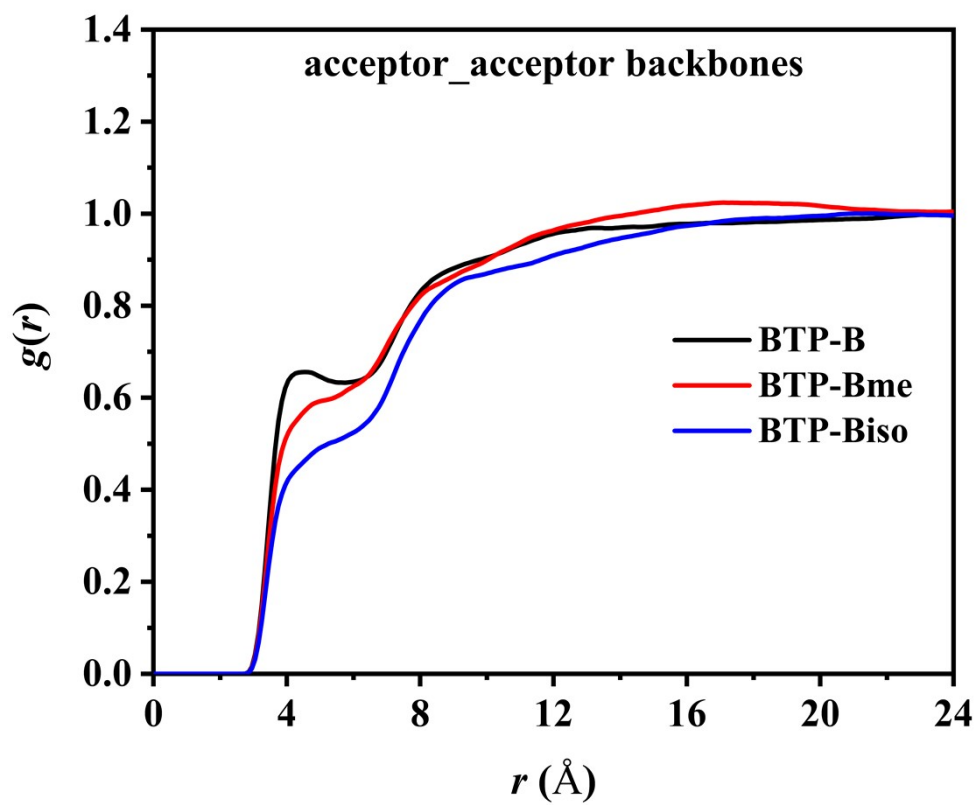

**Figure S2.** Radial distribution functions for the acceptor backbone-backbone interactions in the MD-simulated BTP-B, BTP-Bme, and BTP-Biso films.

**Table S1.** Average intermolecular interaction energies for the end\_end, end\_core, and core\_core  $\pi$ - $\pi$  packing pairs extracted from the MD-simulated BTP-B, BTP-Bme, and BTP-Biso films.

|           | BTP-B<br>(kcal mol <sup>-1</sup> ) | BTP-Bme<br>(kcal mol <sup>-1</sup> ) | BTP-Biso<br>(kcal mol <sup>-1</sup> ) |
|-----------|------------------------------------|--------------------------------------|---------------------------------------|
| end_end   | -15.2±5.9                          | -12.9±4.2                            | -12.7±3.6                             |
| end_core  | -18.0±4.7                          | -16.4±3.7                            | -15.9±3.7                             |
| core_core | -25.9±4.3                          | -19.8±2.7                            | -                                     |
| average   | -17.2±6.2                          | -13.8±4.4                            | -13.0±3.8                             |

**Table S2.** Reorganization energies estimated for the electron transfer processes in the BTP-B, BTP-Bme, and BTP-Biso films.

|          | $\lambda_{\text{intra}}$ (meV) | $\lambda_{\text{inter}}$ (meV) | $\lambda_{\text{total}}$ (meV) |
|----------|--------------------------------|--------------------------------|--------------------------------|
| BTP-B    | 193.8                          | 100.0                          | 293.8                          |
| BTP-Bme  | 188.6                          |                                | 288.6                          |
| BTP-Biso | 185.6                          |                                | 285.6                          |

**Table S3.** Electron transfer rates,  $k_e$ , between acceptors for the 280 BTP-B\_BTP-B, 216 BTP-Bme\_BTP-Bme, and 125 BTP-Biso\_BTP-Biso  $\pi$ - $\pi$  packing pairs extracted from the MD-simulated BTP-B, BTP-Bme, and BTP-Biso films. Here, “small→large” means electron transfer from an acceptor with a smaller EA to one with a larger EA, and “large→small” means the reverse process.

| BTP-B film |                  |                   |             |                     |                          |                       |
|------------|------------------|-------------------|-------------|---------------------|--------------------------|-----------------------|
| pairs      | $ V_e $<br>(meV) | $\Delta E_e$ (eV) |             | $\lambda_e$<br>(eV) | $k_e$ (s <sup>-1</sup> ) |                       |
|            |                  | small→large       | large→small |                     | small→large              | large→small           |
| 1          | 11.27            | -0.001            | 0.001       | 0.294               | $2.27 \times 10^{11}$    | $2.23 \times 10^{11}$ |
| 2          | 3.09             | -0.071            | 0.071       |                     | $5.70 \times 10^{10}$    | $3.60 \times 10^9$    |
| 3          | 8.06             | -0.199            | 0.199       |                     | $1.49 \times 10^{12}$    | $6.48 \times 10^8$    |
| 4          | 11.01            | -0.001            | 0.001       |                     | $2.21 \times 10^{11}$    | $2.09 \times 10^{11}$ |
| 5          | 14.02            | -0.041            | 0.041       |                     | $7.33 \times 10^{11}$    | $1.48 \times 10^{11}$ |
| 6          | 0.26             | -0.143            | 0.143       |                     | $9.97 \times 10^8$       | $3.86 \times 10^6$    |
| 7          | 21.03            | -0.053            | 0.053       |                     | $2.01 \times 10^{12}$    | $2.54 \times 10^{11}$ |
| 8          | 5.63             | -0.048            | 0.048       |                     | $1.32 \times 10^{11}$    | $2.05 \times 10^{10}$ |
| 9          | 4.04             | -0.020            | 0.020       |                     | $4.23 \times 10^{10}$    | $1.92 \times 10^{10}$ |
| 10         | 0.25             | -0.265            | 0.265       |                     | $1.82 \times 10^9$       | $5.89 \times 10^4$    |
| 11         | 14.01            | -0.026            | 0.026       |                     | $5.62 \times 10^{11}$    | $2.06 \times 10^{11}$ |
| 12         | 1.36             | -0.032            | 0.032       |                     | $5.92 \times 10^9$       | $1.72 \times 10^9$    |
| 13         | 2.56             | -0.008            | 0.008       |                     | $1.37 \times 10^{10}$    | $9.88 \times 10^9$    |
| 14         | 1.36             | -0.202            | 0.202       |                     | $4.33 \times 10^{10}$    | $1.68 \times 10^7$    |
| 15         | 3.09             | -0.005            | 0.005       |                     | $1.87 \times 10^{10}$    | $1.53 \times 10^{10}$ |
| 16         | 11.34            | -0.132            | 0.132       |                     | $1.68 \times 10^{12}$    | $9.71 \times 10^9$    |
| 17         | 4.81             | -0.171            | 0.171       |                     | $4.34 \times 10^{11}$    | $5.67 \times 10^8$    |
| 18         | 1.78             | -0.105            | 0.105       |                     | $3.04 \times 10^{10}$    | $5.02 \times 10^8$    |
| 19         | 3.84             | -0.106            | 0.106       |                     | $1.41 \times 10^{11}$    | $2.32 \times 10^9$    |
| 20         | 14.64            | -0.057            | 0.057       |                     | $1.04 \times 10^{12}$    | $1.12 \times 10^{11}$ |
| 21         | 0.07             | -0.078            | 0.078       |                     | $2.91 \times 10^7$       | $1.40 \times 10^6$    |
| 22         | 15.12            | -0.008            | 0.008       |                     | $4.76 \times 10^{11}$    | $3.43 \times 10^{11}$ |
| 23         | 2.89             | -0.154            | 0.154       |                     | $1.34 \times 10^{11}$    | $3.40 \times 10^8$    |
| 24         | 5.64             | -0.046            | 0.046       |                     | $1.28 \times 10^{11}$    | $2.16 \times 10^{10}$ |
| 25         | 7.73             | -0.011            | 0.011       |                     | $1.30 \times 10^{11}$    | $8.58 \times 10^{10}$ |
| 26         | 9.76             | -0.025            | 0.025       |                     | $2.71 \times 10^{11}$    | $1.01 \times 10^{11}$ |
| 27         | 0.32             | -0.028            | 0.028       |                     | $3.04 \times 10^8$       | $1.01 \times 10^8$    |
| 28         | 14.22            | -0.035            | 0.035       |                     | $6.77 \times 10^{11}$    | $1.75 \times 10^{11}$ |
| 29         | 24.76            | -0.007            | 0.007       |                     | $1.25 \times 10^{12}$    | $9.37 \times 10^{11}$ |
| 30         | 8.46             | -0.023            | 0.023       |                     | $1.95 \times 10^{11}$    | $7.95 \times 10^{10}$ |
| 31         | 6.84             | -0.026            | 0.026       |                     | $1.35 \times 10^{11}$    | $4.88 \times 10^{10}$ |

|    |       |        |       |  |                       |                       |
|----|-------|--------|-------|--|-----------------------|-----------------------|
| 32 | 10.68 | -0.036 | 0.036 |  | $3.90 \times 10^{11}$ | $9.61 \times 10^{10}$ |
| 33 | 3.24  | -0.032 | 0.032 |  | $3.34 \times 10^{10}$ | $9.71 \times 10^9$    |
| 34 | 0.83  | -0.038 | 0.038 |  | $2.45 \times 10^9$    | $5.53 \times 10^8$    |
| 35 | 3.80  | -0.136 | 0.136 |  | $1.96 \times 10^{11}$ | $9.72 \times 10^8$    |
| 36 | 5.01  | -0.164 | 0.164 |  | $4.44 \times 10^{11}$ | $7.49 \times 10^8$    |
| 37 | 27.76 | -0.068 | 0.068 |  | $4.40 \times 10^{12}$ | $3.12 \times 10^{11}$ |
| 38 | 9.51  | -0.094 | 0.094 |  | $7.40 \times 10^{11}$ | $1.94 \times 10^{10}$ |
| 39 | 11.61 | -0.012 | 0.012 |  | $3.00 \times 10^{11}$ | $1.89 \times 10^{11}$ |
| 40 | 3.06  | -0.126 | 0.126 |  | $1.13 \times 10^{11}$ | $8.52 \times 10^8$    |
| 41 | 8.88  | -0.064 | 0.064 |  | $4.23 \times 10^{11}$ | $3.51 \times 10^{10}$ |
| 42 | 4.16  | -0.016 | 0.016 |  | $4.15 \times 10^{10}$ | $2.22 \times 10^{10}$ |
| 43 | 14.77 | -0.035 | 0.035 |  | $7.36 \times 10^{11}$ | $1.87 \times 10^{11}$ |
| 44 | 1.02  | -0.021 | 0.021 |  | $2.78 \times 10^9$    | $1.21 \times 10^9$    |
| 45 | 8.70  | -0.061 | 0.061 |  | $3.89 \times 10^{11}$ | $3.61 \times 10^{10}$ |
| 46 | 3.22  | -0.030 | 0.030 |  | $3.18 \times 10^{10}$ | $1.00 \times 10^{10}$ |
| 47 | 29.25 | -0.030 | 0.030 |  | $2.62 \times 10^{12}$ | $8.27 \times 10^{11}$ |
| 48 | 9.11  | -0.031 | 0.031 |  | $2.59 \times 10^{11}$ | $7.86 \times 10^{10}$ |
| 49 | 2.09  | -0.011 | 0.011 |  | $9.63 \times 10^9$    | $6.22 \times 10^9$    |
| 50 | 5.63  | -0.164 | 0.164 |  | $5.62 \times 10^{11}$ | $9.43 \times 10^8$    |
| 51 | 1.20  | -0.094 | 0.094 |  | $1.20 \times 10^{10}$ | $3.03 \times 10^8$    |
| 52 | 2.00  | -0.038 | 0.038 |  | $1.42 \times 10^{10}$ | $3.22 \times 10^9$    |
| 53 | 0.85  | -0.005 | 0.005 |  | $1.39 \times 10^9$    | $1.17 \times 10^9$    |
| 54 | 0.14  | -0.028 | 0.028 |  | $5.82 \times 10^7$    | $1.94 \times 10^7$    |
| 55 | 8.10  | -0.145 | 0.145 |  | $9.70 \times 10^{11}$ | $3.50 \times 10^9$    |
| 56 | 2.81  | -0.153 | 0.153 |  | $1.27 \times 10^{11}$ | $3.28 \times 10^8$    |
| 57 | 5.46  | -0.108 | 0.108 |  | $2.92 \times 10^{11}$ | $4.45 \times 10^9$    |
| 58 | 5.52  | -0.028 | 0.028 |  | $9.12 \times 10^{10}$ | $3.03 \times 10^{10}$ |
| 59 | 0.20  | -0.055 | 0.055 |  | $1.82 \times 10^8$    | $2.13 \times 10^7$    |
| 60 | 1.48  | -0.015 | 0.015 |  | $5.16 \times 10^9$    | $2.90 \times 10^9$    |
| 61 | 9.83  | -0.033 | 0.033 |  | $3.11 \times 10^{11}$ | $8.77 \times 10^{10}$ |
| 62 | 9.79  | -0.051 | 0.051 |  | $4.21 \times 10^{11}$ | $5.76 \times 10^{10}$ |
| 63 | 8.44  | -0.032 | 0.032 |  | $2.28 \times 10^{11}$ | $6.52 \times 10^{10}$ |
| 64 | 0.07  | -0.079 | 0.079 |  | $3.62 \times 10^7$    | $1.65 \times 10^6$    |
| 65 | 23.04 | -0.003 | 0.003 |  | $9.97 \times 10^{11}$ | $8.86 \times 10^{11}$ |
| 66 | 5.10  | -0.106 | 0.106 |  | $2.51 \times 10^{11}$ | $4.00 \times 10^9$    |
| 67 | 14.19 | -0.096 | 0.096 |  | $1.71 \times 10^{12}$ | $4.04 \times 10^{10}$ |
| 68 | 3.00  | -0.018 | 0.018 |  | $2.25 \times 10^{10}$ | $1.10 \times 10^{10}$ |
| 69 | 1.72  | -0.038 | 0.038 |  | $1.04 \times 10^{10}$ | $2.42 \times 10^9$    |
| 70 | 42.68 | -0.082 | 0.082 |  | $1.28 \times 10^{13}$ | $5.20 \times 10^{11}$ |

|     |       |        |       |  |                       |                       |
|-----|-------|--------|-------|--|-----------------------|-----------------------|
| 71  | 16.25 | -0.101 | 0.101 |  | $2.40 \times 10^{12}$ | $4.61 \times 10^{10}$ |
| 72  | 2.22  | -0.036 | 0.036 |  | $1.67 \times 10^{10}$ | $4.18 \times 10^9$    |
| 73  | 2.60  | -0.095 | 0.095 |  | $5.66 \times 10^{10}$ | $1.40 \times 10^9$    |
| 74  | 5.42  | -0.079 | 0.079 |  | $1.97 \times 10^{11}$ | $9.12 \times 10^9$    |
| 75  | 4.55  | -0.063 | 0.063 |  | $1.10 \times 10^{11}$ | $9.39 \times 10^9$    |
| 76  | 5.88  | -0.063 | 0.063 |  | $1.83 \times 10^{11}$ | $1.58 \times 10^{10}$ |
| 77  | 5.33  | -0.084 | 0.084 |  | $2.04 \times 10^{11}$ | $7.79 \times 10^9$    |
| 78  | 11.95 | -0.077 | 0.077 |  | $9.27 \times 10^{11}$ | $4.69 \times 10^{10}$ |
| 79  | 14.51 | -0.088 | 0.088 |  | $1.59 \times 10^{12}$ | $5.25 \times 10^{10}$ |
| 80  | 17.80 | -0.066 | 0.066 |  | $1.76 \times 10^{12}$ | $1.34 \times 10^{11}$ |
| 81  | 5.49  | -0.218 | 0.218 |  | $7.71 \times 10^{11}$ | $1.57 \times 10^8$    |
| 82  | 0.16  | -0.072 | 0.072 |  | $1.57 \times 10^8$    | $9.64 \times 10^6$    |
| 83  | 19.84 | -0.074 | 0.074 |  | $2.46 \times 10^{12}$ | $1.38 \times 10^{11}$ |
| 84  | 5.76  | -0.070 | 0.070 |  | $1.96 \times 10^{11}$ | $1.28 \times 10^{10}$ |
| 85  | 4.07  | -0.091 | 0.091 |  | $1.32 \times 10^{11}$ | $3.75 \times 10^9$    |
| 86  | 23.52 | -0.033 | 0.033 |  | $1.80 \times 10^{12}$ | $4.97 \times 10^{11}$ |
| 87  | 15.40 | -0.130 | 0.130 |  | $3.03 \times 10^{12}$ | $1.89 \times 10^{10}$ |
| 88  | 2.18  | -0.046 | 0.046 |  | $1.94 \times 10^{10}$ | $3.18 \times 10^9$    |
| 89  | 6.76  | -0.247 | 0.247 |  | $1.32 \times 10^{12}$ | $8.75 \times 10^7$    |
| 90  | 14.37 | -0.008 | 0.008 |  | $4.25 \times 10^{11}$ | $3.14 \times 10^{11}$ |
| 91  | 9.28  | -0.154 | 0.154 |  | $1.40 \times 10^{12}$ | $3.45 \times 10^9$    |
| 92  | 3.72  | -0.012 | 0.012 |  | $3.05 \times 10^{10}$ | $1.95 \times 10^{10}$ |
| 93  | 19.85 | -0.078 | 0.078 |  | $2.59 \times 10^{12}$ | $1.26 \times 10^{11}$ |
| 94  | 1.99  | -0.017 | 0.017 |  | $9.63 \times 10^9$    | $5.04 \times 10^9$    |
| 95  | 28.42 | -0.049 | 0.049 |  | $3.41 \times 10^{12}$ | $5.13 \times 10^{11}$ |
| 96  | 27.40 | -0.136 | 0.136 |  | $1.02 \times 10^{13}$ | $5.05 \times 10^{10}$ |
| 97  | 1.99  | -0.051 | 0.051 |  | $1.76 \times 10^{10}$ | $2.37 \times 10^9$    |
| 98  | 5.35  | -0.061 | 0.061 |  | $1.48 \times 10^{11}$ | $1.36 \times 10^{10}$ |
| 99  | 5.45  | -0.052 | 0.052 |  | $1.33 \times 10^{11}$ | $1.73 \times 10^{10}$ |
| 100 | 18.12 | -0.100 | 0.100 |  | $2.93 \times 10^{12}$ | $5.97 \times 10^{10}$ |
| 101 | 7.46  | -0.058 | 0.058 |  | $2.71 \times 10^{11}$ | $2.88 \times 10^{10}$ |
| 102 | 8.75  | -0.031 | 0.031 |  | $2.41 \times 10^{11}$ | $7.19 \times 10^{10}$ |
| 103 | 13.14 | -0.030 | 0.030 |  | $5.29 \times 10^{11}$ | $1.67 \times 10^{11}$ |
| 104 | 19.11 | -0.134 | 0.134 |  | $4.84 \times 10^{12}$ | $2.65 \times 10^{10}$ |
| 105 | 16.51 | -0.010 | 0.010 |  | $5.83 \times 10^{11}$ | $3.98 \times 10^{11}$ |
| 106 | 0.71  | -0.091 | 0.091 |  | $3.94 \times 10^9$    | $1.16 \times 10^8$    |
| 107 | 95.06 | -0.078 | 0.078 |  | $5.95 \times 10^{13}$ | $2.89 \times 10^{12}$ |
| 108 | 9.23  | -0.050 | 0.050 |  | $3.70 \times 10^{11}$ | $5.23 \times 10^{10}$ |
| 109 | 12.34 | -0.073 | 0.073 |  | $9.31 \times 10^{11}$ | $5.51 \times 10^{10}$ |

|     |       |        |       |  |                       |                       |
|-----|-------|--------|-------|--|-----------------------|-----------------------|
| 110 | 22.28 | -0.092 | 0.092 |  | $4.00 \times 10^{12}$ | $1.10 \times 10^{11}$ |
| 111 | 17.38 | -0.067 | 0.067 |  | $1.70 \times 10^{12}$ | $1.25 \times 10^{11}$ |
| 112 | 2.92  | -0.050 | 0.050 |  | $3.71 \times 10^{10}$ | $5.21 \times 10^9$    |
| 113 | 6.26  | -0.092 | 0.092 |  | $3.16 \times 10^{11}$ | $8.71 \times 10^9$    |
| 114 | 0.78  | -0.101 | 0.101 |  | $5.44 \times 10^9$    | $1.07 \times 10^8$    |
| 115 | 32.84 | -0.121 | 0.121 |  | $1.25 \times 10^{13}$ | $1.10 \times 10^{11}$ |
| 116 | 29.71 | -0.002 | 0.002 |  | $1.63 \times 10^{12}$ | $1.50 \times 10^{12}$ |
| 117 | 17.36 | -0.191 | 0.191 |  | $6.59 \times 10^{12}$ | $3.85 \times 10^9$    |
| 118 | 7.66  | -0.059 | 0.059 |  | $2.94 \times 10^{11}$ | $2.92 \times 10^{10}$ |
| 119 | 9.09  | -0.102 | 0.102 |  | $7.57 \times 10^{11}$ | $1.42 \times 10^{10}$ |
| 120 | 15.36 | -0.145 | 0.145 |  | $3.52 \times 10^{12}$ | $1.23 \times 10^{10}$ |
| 121 | 8.39  | -0.043 | 0.043 |  | $2.72 \times 10^{11}$ | $5.05 \times 10^{10}$ |
| 122 | 10.84 | -0.007 | 0.007 |  | $2.39 \times 10^{11}$ | $1.80 \times 10^{11}$ |
| 123 | 0.65  | -0.113 | 0.113 |  | $4.39 \times 10^9$    | $5.47 \times 10^7$    |
| 124 | 17.81 | -0.016 | 0.016 |  | $7.65 \times 10^{11}$ | $4.06 \times 10^{11}$ |
| 125 | 1.55  | -0.028 | 0.028 |  | $7.21 \times 10^9$    | $2.38 \times 10^9$    |
| 126 | 8.57  | -0.034 | 0.034 |  | $2.44 \times 10^{11}$ | $6.43 \times 10^{10}$ |
| 127 | 2.74  | -0.091 | 0.091 |  | $5.99 \times 10^{10}$ | $1.71 \times 10^9$    |
| 128 | 9.50  | -0.106 | 0.106 |  | $8.66 \times 10^{11}$ | $1.40 \times 10^{10}$ |
| 129 | 43.03 | -0.009 | 0.009 |  | $3.90 \times 10^{12}$ | $2.74 \times 10^{12}$ |
| 130 | 19.80 | -0.110 | 0.110 |  | $3.98 \times 10^{12}$ | $5.41 \times 10^{10}$ |
| 131 | 10.48 | -0.029 | 0.029 |  | $3.32 \times 10^{11}$ | $1.08 \times 10^{11}$ |
| 132 | 6.17  | -0.015 | 0.015 |  | $8.97 \times 10^{10}$ | $4.99 \times 10^{10}$ |
| 133 | 14.26 | -0.040 | 0.040 |  | $7.48 \times 10^{11}$ | $1.56 \times 10^{11}$ |
| 134 | 29.29 | -0.085 | 0.085 |  | $6.23 \times 10^{12}$ | $2.31 \times 10^{11}$ |
| 135 | 38.28 | -0.029 | 0.029 |  | $4.44 \times 10^{12}$ | $1.44 \times 10^{12}$ |
| 136 | 1.72  | -0.073 | 0.073 |  | $1.81 \times 10^{10}$ | $1.07 \times 10^9$    |
| 137 | 1.25  | -0.089 | 0.089 |  | $1.20 \times 10^{10}$ | $3.80 \times 10^8$    |
| 138 | 13.67 | -0.061 | 0.061 |  | $9.67 \times 10^{11}$ | $8.84 \times 10^{10}$ |
| 139 | 1.18  | -0.007 | 0.007 |  | $2.82 \times 10^9$    | $2.18 \times 10^9$    |
| 140 | 4.35  | -0.069 | 0.069 |  | $1.10 \times 10^{11}$ | $7.44 \times 10^9$    |
| 141 | 2.83  | -0.050 | 0.050 |  | $3.49 \times 10^{10}$ | $4.91 \times 10^9$    |
| 142 | 3.96  | -0.032 | 0.032 |  | $5.03 \times 10^{10}$ | $1.43 \times 10^{10}$ |
| 143 | 8.90  | -0.016 | 0.016 |  | $1.90 \times 10^{11}$ | $1.02 \times 10^{11}$ |
| 144 | 10.15 | -0.022 | 0.022 |  | $2.78 \times 10^{11}$ | $1.16 \times 10^{11}$ |
| 145 | 16.12 | -0.080 | 0.080 |  | $1.78 \times 10^{12}$ | $7.76 \times 10^{10}$ |
| 146 | 57.55 | -0.080 | 0.080 |  | $2.27 \times 10^{13}$ | $9.90 \times 10^{11}$ |
| 147 | 4.48  | -0.069 | 0.069 |  | $1.17 \times 10^{11}$ | $7.91 \times 10^9$    |
| 148 | 9.08  | -0.015 | 0.015 |  | $1.93 \times 10^{11}$ | $1.09 \times 10^{11}$ |

|     |       |        |       |  |                       |                       |
|-----|-------|--------|-------|--|-----------------------|-----------------------|
| 149 | 51.08 | -0.120 | 0.120 |  | $2.96 \times 10^{13}$ | $2.79 \times 10^{11}$ |
| 150 | 3.67  | -0.116 | 0.116 |  | $1.46 \times 10^{11}$ | $1.59 \times 10^9$    |
| 151 | 4.72  | -0.128 | 0.128 |  | $2.78 \times 10^{11}$ | $1.90 \times 10^9$    |
| 152 | 14.24 | -0.069 | 0.069 |  | $1.18 \times 10^{12}$ | $8.00 \times 10^{10}$ |
| 153 | 6.17  | -0.003 | 0.003 |  | $7.15 \times 10^{10}$ | $6.37 \times 10^{10}$ |
| 154 | 0.91  | -0.010 | 0.010 |  | $1.80 \times 10^9$    | $1.20 \times 10^9$    |
| 155 | 10.20 | -0.043 | 0.043 |  | $4.00 \times 10^{11}$ | $7.51 \times 10^{10}$ |
| 156 | 1.33  | -0.075 | 0.075 |  | $1.12 \times 10^{10}$ | $6.10 \times 10^8$    |
| 157 | 1.16  | -0.316 | 0.316 |  | $4.10 \times 10^{10}$ | $1.84 \times 10^5$    |
| 158 | 52.03 | -0.088 | 0.088 |  | $2.06 \times 10^{13}$ | $6.70 \times 10^{11}$ |
| 159 | 2.26  | -0.059 | 0.059 |  | $2.55 \times 10^{10}$ | $2.55 \times 10^9$    |
| 160 | 0.22  | -0.073 | 0.073 |  | $2.92 \times 10^8$    | $1.71 \times 10^7$    |
| 161 | 4.22  | -0.048 | 0.048 |  | $7.38 \times 10^{10}$ | $1.16 \times 10^{10}$ |
| 162 | 0.72  | -0.095 | 0.095 |  | $4.36 \times 10^9$    | $1.10 \times 10^8$    |
| 163 | 15.62 | -0.014 | 0.014 |  | $5.63 \times 10^{11}$ | $3.28 \times 10^{11}$ |
| 164 | 36.48 | -0.006 | 0.006 |  | $2.67 \times 10^{12}$ | $2.08 \times 10^{12}$ |
| 165 | 54.92 | -0.072 | 0.072 |  | $1.82 \times 10^{13}$ | $1.11 \times 10^{12}$ |
| 166 | 23.23 | -0.093 | 0.093 |  | $4.39 \times 10^{12}$ | $1.18 \times 10^{11}$ |
| 167 | 18.30 | -0.075 | 0.075 |  | $2.11 \times 10^{12}$ | $1.15 \times 10^{11}$ |
| 168 | 21.96 | -0.051 | 0.051 |  | $2.12 \times 10^{12}$ | $2.90 \times 10^{11}$ |
| 169 | 20.09 | -0.069 | 0.069 |  | $2.33 \times 10^{12}$ | $1.60 \times 10^{11}$ |
| 170 | 11.01 | -0.029 | 0.029 |  | $3.70 \times 10^{11}$ | $1.18 \times 10^{11}$ |
| 171 | 0.92  | -0.072 | 0.072 |  | $5.07 \times 10^9$    | $3.12 \times 10^8$    |
| 172 | 2.61  | -0.029 | 0.029 |  | $2.07 \times 10^{10}$ | $6.68 \times 10^9$    |
| 173 | 2.14  | -0.004 | 0.004 |  | $8.75 \times 10^9$    | $7.52 \times 10^9$    |
| 174 | 16.73 | -0.074 | 0.074 |  | $1.75 \times 10^{12}$ | $9.83 \times 10^{10}$ |
| 175 | 16.04 | -0.022 | 0.022 |  | $6.85 \times 10^{11}$ | $2.94 \times 10^{11}$ |
| 176 | 12.02 | -0.046 | 0.046 |  | $5.83 \times 10^{11}$ | $9.81 \times 10^{10}$ |
| 177 | 37.13 | -0.003 | 0.003 |  | $2.59 \times 10^{12}$ | $2.30 \times 10^{12}$ |
| 178 | 57.33 | -0.103 | 0.103 |  | $3.04 \times 10^{13}$ | $5.54 \times 10^{11}$ |
| 179 | 9.78  | -0.122 | 0.122 |  | $1.11 \times 10^{12}$ | $9.71 \times 10^9$    |
| 180 | 8.31  | -0.035 | 0.035 |  | $2.32 \times 10^{11}$ | $5.96 \times 10^{10}$ |
| 181 | 8.36  | -0.048 | 0.048 |  | $2.92 \times 10^{11}$ | $4.51 \times 10^{10}$ |
| 182 | 7.66  | -0.118 | 0.118 |  | $6.53 \times 10^{11}$ | $6.56 \times 10^9$    |
| 183 | 2.91  | -0.243 | 0.243 |  | $2.41 \times 10^{11}$ | $1.88 \times 10^7$    |
| 184 | 2.83  | -0.037 | 0.037 |  | $2.81 \times 10^{10}$ | $6.59 \times 10^9$    |
| 185 | 0.19  | -0.119 | 0.119 |  | $3.95 \times 10^8$    | $3.80 \times 10^6$    |
| 186 | 1.15  | -0.041 | 0.041 |  | $4.93 \times 10^9$    | $1.01 \times 10^9$    |
| 187 | 5.78  | -0.155 | 0.155 |  | $5.48 \times 10^{11}$ | $1.29 \times 10^9$    |

|     |       |        |       |  |                       |                       |
|-----|-------|--------|-------|--|-----------------------|-----------------------|
| 188 | 1.81  | -0.150 | 0.150 |  | $5.14 \times 10^{10}$ | $1.49 \times 10^8$    |
| 189 | 35.88 | -0.086 | 0.086 |  | $9.57 \times 10^{12}$ | $3.32 \times 10^{11}$ |
| 190 | 12.54 | -0.047 | 0.047 |  | $6.49 \times 10^{11}$ | $1.03 \times 10^{11}$ |
| 191 | 11.04 | -0.028 | 0.028 |  | $3.62 \times 10^{11}$ | $1.22 \times 10^{11}$ |
| 192 | 21.20 | -0.182 | 0.182 |  | $9.21 \times 10^{12}$ | $7.65 \times 10^9$    |
| 193 | 16.76 | -0.022 | 0.022 |  | $7.56 \times 10^{11}$ | $3.17 \times 10^{11}$ |
| 194 | 44.98 | -0.009 | 0.009 |  | $4.25 \times 10^{12}$ | $3.01 \times 10^{12}$ |
| 195 | 26.39 | -0.021 | 0.021 |  | $1.84 \times 10^{12}$ | $8.04 \times 10^{11}$ |
| 196 | 4.41  | -0.018 | 0.018 |  | $4.88 \times 10^{10}$ | $2.38 \times 10^{10}$ |
| 197 | 1.75  | -0.121 | 0.121 |  | $3.55 \times 10^{10}$ | $3.14 \times 10^8$    |
| 198 | 15.34 | -0.022 | 0.022 |  | $6.25 \times 10^{11}$ | $2.70 \times 10^{11}$ |
| 199 | 4.16  | -0.008 | 0.008 |  | $3.60 \times 10^{10}$ | $2.60 \times 10^{10}$ |
| 200 | 16.56 | -0.161 | 0.161 |  | $4.75 \times 10^{12}$ | $8.88 \times 10^9$    |
| 201 | 38.86 | -0.154 | 0.154 |  | $2.44 \times 10^{13}$ | $6.17 \times 10^{10}$ |
| 202 | 0.30  | -0.092 | 0.092 |  | $7.20 \times 10^8$    | $1.98 \times 10^7$    |
| 203 | 3.48  | -0.070 | 0.070 |  | $7.16 \times 10^{10}$ | $4.61 \times 10^9$    |
| 204 | 12.40 | -0.159 | 0.159 |  | $2.60 \times 10^{12}$ | $5.38 \times 10^9$    |
| 205 | 1.09  | -0.004 | 0.004 |  | $2.27 \times 10^9$    | $1.95 \times 10^9$    |
| 206 | 5.10  | -0.120 | 0.120 |  | $2.96 \times 10^{11}$ | $2.76 \times 10^9$    |
| 207 | 44.18 | -0.002 | 0.002 |  | $3.63 \times 10^{12}$ | $3.30 \times 10^{12}$ |
| 208 | 34.08 | -0.022 | 0.022 |  | $3.12 \times 10^{12}$ | $1.32 \times 10^{12}$ |
| 209 | 4.45  | -0.002 | 0.002 |  | $3.65 \times 10^{10}$ | $3.37 \times 10^{10}$ |
| 210 | 8.18  | -0.027 | 0.027 |  | $1.97 \times 10^{11}$ | $6.78 \times 10^{10}$ |
| 211 | 8.63  | -0.007 | 0.007 |  | $1.50 \times 10^{11}$ | $1.16 \times 10^{11}$ |
| 212 | 8.90  | -0.023 | 0.023 |  | $2.14 \times 10^{11}$ | $8.90 \times 10^{10}$ |
| 213 | 1.16  | -0.060 | 0.060 |  | $6.85 \times 10^9$    | $6.58 \times 10^8$    |
| 214 | 16.66 | -0.023 | 0.023 |  | $7.51 \times 10^{11}$ | $3.12 \times 10^{11}$ |
| 215 | 4.67  | -0.009 | 0.009 |  | $4.61 \times 10^{10}$ | $3.22 \times 10^{10}$ |
| 216 | 50.55 | -0.039 | 0.039 |  | $9.14 \times 10^{12}$ | $2.03 \times 10^{12}$ |
| 217 | 3.96  | -0.035 | 0.035 |  | $5.23 \times 10^{10}$ | $1.36 \times 10^{10}$ |
| 218 | 7.06  | -0.065 | 0.065 |  | $2.70 \times 10^{11}$ | $2.19 \times 10^{10}$ |
| 219 | 30.25 | -0.077 | 0.077 |  | $6.00 \times 10^{12}$ | $2.95 \times 10^{11}$ |
| 220 | 1.82  | -0.053 | 0.053 |  | $1.50 \times 10^{10}$ | $1.88 \times 10^9$    |
| 221 | 1.00  | -0.038 | 0.038 |  | $3.55 \times 10^9$    | $8.23 \times 10^8$    |
| 222 | 13.34 | -0.002 | 0.002 |  | $3.30 \times 10^{11}$ | $3.02 \times 10^{11}$ |
| 223 | 3.54  | -0.068 | 0.068 |  | $7.18 \times 10^{10}$ | $5.07 \times 10^9$    |
| 224 | 49.48 | -0.066 | 0.066 |  | $1.37 \times 10^{13}$ | $1.03 \times 10^{12}$ |
| 225 | 28.45 | -0.085 | 0.085 |  | $5.90 \times 10^{12}$ | $2.16 \times 10^{11}$ |
| 226 | 19.57 | -0.039 | 0.039 |  | $1.38 \times 10^{12}$ | $3.03 \times 10^{11}$ |

|     |       |        |       |  |                       |                       |
|-----|-------|--------|-------|--|-----------------------|-----------------------|
| 227 | 1.25  | -0.023 | 0.023 |  | $4.25 \times 10^9$    | $1.72 \times 10^9$    |
| 228 | 0.75  | -0.059 | 0.059 |  | $2.81 \times 10^9$    | $2.77 \times 10^8$    |
| 229 | 17.13 | -0.132 | 0.132 |  | $3.81 \times 10^{12}$ | $2.24 \times 10^{10}$ |
| 230 | 52.86 | -0.168 | 0.168 |  | $5.13 \times 10^{13}$ | $7.30 \times 10^{10}$ |
| 231 | 1.94  | -0.058 | 0.058 |  | $1.84 \times 10^{10}$ | $1.93 \times 10^9$    |
| 232 | 15.29 | -0.050 | 0.050 |  | $1.00 \times 10^{12}$ | $1.46 \times 10^{11}$ |
| 233 | 21.02 | -0.017 | 0.017 |  | $1.07 \times 10^{12}$ | $5.62 \times 10^{11}$ |
| 234 | 8.66  | -0.073 | 0.073 |  | $4.59 \times 10^{11}$ | $2.71 \times 10^{10}$ |
| 235 | 0.27  | -0.107 | 0.107 |  | $6.93 \times 10^8$    | $1.06 \times 10^7$    |
| 236 | 8.63  | -0.090 | 0.090 |  | $5.85 \times 10^{11}$ | $1.73 \times 10^{10}$ |
| 237 | 5.23  | -0.078 | 0.078 |  | $1.80 \times 10^{11}$ | $8.71 \times 10^9$    |
| 238 | 3.88  | -0.100 | 0.100 |  | $1.33 \times 10^{11}$ | $2.75 \times 10^9$    |
| 239 | 30.13 | -0.021 | 0.021 |  | $2.37 \times 10^{12}$ | $1.06 \times 10^{12}$ |
| 240 | 15.73 | -0.015 | 0.015 |  | $5.83 \times 10^{11}$ | $3.25 \times 10^{11}$ |
| 241 | 36.53 | -0.096 | 0.096 |  | $1.13 \times 10^{13}$ | $2.70 \times 10^{11}$ |
| 242 | 15.03 | -0.082 | 0.082 |  | $1.57 \times 10^{12}$ | $6.57 \times 10^{10}$ |
| 243 | 6.71  | -0.088 | 0.088 |  | $3.42 \times 10^{11}$ | $1.11 \times 10^{10}$ |
| 244 | 4.16  | -0.004 | 0.004 |  | $3.29 \times 10^{10}$ | $2.86 \times 10^{10}$ |
| 245 | 26.66 | -0.022 | 0.022 |  | $1.89 \times 10^{12}$ | $8.16 \times 10^{11}$ |
| 246 | 16.34 | -0.035 | 0.035 |  | $9.02 \times 10^{11}$ | $2.28 \times 10^{11}$ |
| 247 | 10.55 | -0.077 | 0.077 |  | $7.28 \times 10^{11}$ | $3.61 \times 10^{10}$ |
| 248 | 38.26 | -0.161 | 0.161 |  | $2.53 \times 10^{13}$ | $4.77 \times 10^{10}$ |
| 249 | 44.85 | -0.100 | 0.100 |  | $1.80 \times 10^{13}$ | $3.62 \times 10^{11}$ |
| 250 | 14.05 | -0.036 | 0.036 |  | $6.80 \times 10^{11}$ | $1.65 \times 10^{11}$ |
| 251 | 32.08 | -0.080 | 0.080 |  | $7.04 \times 10^{12}$ | $3.08 \times 10^{11}$ |
| 252 | 41.49 | -0.087 | 0.087 |  | $1.28 \times 10^{13}$ | $4.42 \times 10^{11}$ |
| 253 | 3.87  | -0.089 | 0.089 |  | $1.15 \times 10^{11}$ | $3.64 \times 10^9$    |
| 254 | 0.25  | -0.121 | 0.121 |  | $7.28 \times 10^8$    | $6.57 \times 10^6$    |
| 255 | 31.41 | -0.076 | 0.076 |  | $6.32 \times 10^{12}$ | $3.31 \times 10^{11}$ |
| 256 | 5.87  | -0.133 | 0.133 |  | $4.51 \times 10^{11}$ | $2.57 \times 10^9$    |
| 257 | 28.28 | -0.018 | 0.018 |  | $1.98 \times 10^{12}$ | $9.93 \times 10^{11}$ |
| 258 | 1.11  | -0.064 | 0.064 |  | $6.59 \times 10^9$    | $5.50 \times 10^8$    |
| 259 | 9.72  | -0.153 | 0.153 |  | $1.52 \times 10^{12}$ | $3.89 \times 10^9$    |
| 260 | 3.87  | -0.029 | 0.029 |  | $4.56 \times 10^{10}$ | $1.46 \times 10^{10}$ |
| 261 | 0.30  | -0.037 | 0.037 |  | $3.15 \times 10^8$    | $7.34 \times 10^7$    |
| 262 | 5.85  | -0.028 | 0.028 |  | $1.01 \times 10^{11}$ | $3.46 \times 10^{10}$ |
| 263 | 63.43 | -0.033 | 0.033 |  | $1.31 \times 10^{13}$ | $3.61 \times 10^{12}$ |
| 264 | 12.19 | -0.134 | 0.134 |  | $1.97 \times 10^{12}$ | $1.08 \times 10^{10}$ |
| 265 | 8.91  | -0.052 | 0.052 |  | $3.55 \times 10^{11}$ | $4.67 \times 10^{10}$ |

|      |                 |                  |                 |  |                       |                                |                                |
|------|-----------------|------------------|-----------------|--|-----------------------|--------------------------------|--------------------------------|
| 266  | 6.15            | -0.091           | 0.091           |  | $3.00 \times 10^{11}$ | $8.62 \times 10^9$             |                                |
| 267  | 1.43            | -0.105           | 0.105           |  | $1.94 \times 10^{10}$ | $3.29 \times 10^8$             |                                |
| 268  | 1.65            | -0.121           | 0.121           |  | $3.11 \times 10^{10}$ | $2.83 \times 10^8$             |                                |
| 269  | 41.66           | -0.149           | 0.149           |  | $2.69 \times 10^{13}$ | $8.02 \times 10^{10}$          |                                |
| 270  | 23.51           | -0.061           | 0.061           |  | $2.84 \times 10^{12}$ | $2.64 \times 10^{11}$          |                                |
| 271  | 19.17           | -0.148           | 0.148           |  | $5.61 \times 10^{12}$ | $1.78 \times 10^{10}$          |                                |
| 272  | 8.81            | -0.061           | 0.061           |  | $4.00 \times 10^{11}$ | $3.70 \times 10^{10}$          |                                |
| 273  | 18.38           | -0.021           | 0.021           |  | $8.95 \times 10^{11}$ | $3.89 \times 10^{11}$          |                                |
| 274  | 8.41            | -0.116           | 0.116           |  | $7.69 \times 10^{11}$ | $8.35 \times 10^9$             |                                |
| 275  | 1.92            | -0.093           | 0.093           |  | $3.03 \times 10^{10}$ | $8.00 \times 10^8$             |                                |
| 276  | 12.97           | -0.022           | 0.022           |  | $4.51 \times 10^{11}$ | $1.90 \times 10^{11}$          |                                |
| 277  | 6.46            | -0.036           | 0.036           |  | $1.43 \times 10^{11}$ | $3.52 \times 10^{10}$          |                                |
| 278  | 7.40            | -0.062           | 0.062           |  | $2.84 \times 10^{11}$ | $2.59 \times 10^{10}$          |                                |
| 279  | 5.86            | -0.132           | 0.132           |  | $4.47 \times 10^{11}$ | $2.59 \times 10^9$             |                                |
| 280  | 25.38           | -0.043           | 0.043           |  | $2.49 \times 10^{12}$ | $4.61 \times 10^{11}$          |                                |
| Avg. | 12.65±<br>13.75 | -0.068±<br>0.052 | 0.068±<br>0.052 |  | 0.294                 | 2.38±<br>$6.54 \times 10^{12}$ | 2.02±<br>$5.07 \times 10^{11}$ |

| BTP-Bme film |                  |                   |             |                     |                          |                       |
|--------------|------------------|-------------------|-------------|---------------------|--------------------------|-----------------------|
| pairs        | $ V_e $<br>(meV) | $\Delta E_c$ (eV) |             | $\lambda_c$<br>(eV) | $k_c$ (s <sup>-1</sup> ) |                       |
|              |                  | small→large       | large→small |                     | small→large              | large→small           |
| 1            | 4.15             | -0.052            | 0.052       | 0.289               | $8.09 \times 10^{10}$    | $1.08 \times 10^{10}$ |
| 2            | 4.04             | -0.007            | 0.007       |                     | $3.54 \times 10^{10}$    | $2.64 \times 10^{10}$ |
| 3            | 5.22             | -0.018            | 0.018       |                     | $7.18 \times 10^{10}$    | $3.58 \times 10^{10}$ |
| 4            | 4.45             | -0.027            | 0.027       |                     | $6.11 \times 10^{10}$    | $2.16 \times 10^{10}$ |
| 5            | 7.37             | -0.151            | 0.151       |                     | $8.94 \times 10^{11}$    | $2.54 \times 10^9$    |
| 6            | 13.15            | -0.017            | 0.017       |                     | $4.49 \times 10^{11}$    | $2.31 \times 10^{11}$ |
| 7            | 6.07             | -0.012            | 0.012       |                     | $8.75 \times 10^{10}$    | $5.45 \times 10^{10}$ |
| 8            | 8.25             | -0.102            | 0.102       |                     | $6.53 \times 10^{11}$    | $1.25 \times 10^{10}$ |
| 9            | 4.09             | -0.041            | 0.041       |                     | $6.62 \times 10^{10}$    | $1.34 \times 10^{10}$ |
| 10           | 7.24             | -0.055            | 0.055       |                     | $2.61 \times 10^{11}$    | $3.02 \times 10^{10}$ |
| 11           | 21.33            | -0.004            | 0.004       |                     | $9.33 \times 10^{11}$    | $7.84 \times 10^{11}$ |
| 12           | 7.04             | -0.032            | 0.032       |                     | $1.69 \times 10^{11}$    | $4.78 \times 10^{10}$ |
| 13           | 6.27             | -0.049            | 0.049       |                     | $1.76 \times 10^{11}$    | $2.65 \times 10^{10}$ |
| 14           | 4.84             | -0.147            | 0.147       |                     | $3.74 \times 10^{11}$    | $1.20 \times 10^9$    |
| 15           | 2.19             | -0.057            | 0.057       |                     | $2.43 \times 10^{10}$    | $2.68 \times 10^9$    |
| 16           | 6.08             | -0.155            | 0.155       |                     | $6.30 \times 10^{11}$    | $1.54 \times 10^9$    |
| 17           | 8.12             | -0.071            | 0.071       |                     | $4.19 \times 10^{11}$    | $2.60 \times 10^{10}$ |
| 18           | 0.78             | -0.034            | 0.034       |                     | $2.13 \times 10^9$       | $5.70 \times 10^8$    |
| 19           | 4.50             | -0.067            | 0.067       |                     | $1.20 \times 10^{11}$    | $9.01 \times 10^9$    |

|    |       |        |       |  |                       |                       |
|----|-------|--------|-------|--|-----------------------|-----------------------|
| 20 | 14.92 | -0.054 | 0.054 |  | $1.08 \times 10^{12}$ | $1.33 \times 10^{11}$ |
| 21 | 8.13  | -0.023 | 0.023 |  | $1.91 \times 10^{11}$ | $7.84 \times 10^{10}$ |
| 22 | 10.74 | -0.116 | 0.116 |  | $1.31 \times 10^{12}$ | $1.45 \times 10^{10}$ |
| 23 | 4.46  | -0.106 | 0.106 |  | $2.02 \times 10^{11}$ | $3.27 \times 10^9$    |
| 24 | 3.33  | -0.093 | 0.093 |  | $9.50 \times 10^{10}$ | $2.56 \times 10^9$    |
| 25 | 2.20  | -0.176 | 0.176 |  | $9.81 \times 10^{10}$ | $1.05 \times 10^8$    |
| 26 | 3.96  | -0.105 | 0.105 |  | $1.58 \times 10^{11}$ | $2.60 \times 10^9$    |
| 27 | 19.03 | -0.120 | 0.120 |  | $4.33 \times 10^{12}$ | $4.07 \times 10^{10}$ |
| 28 | 11.98 | -0.083 | 0.083 |  | $1.08 \times 10^{12}$ | $4.22 \times 10^{10}$ |
| 29 | 1.29  | -0.044 | 0.044 |  | $6.86 \times 10^9$    | $1.26 \times 10^9$    |
| 30 | 8.95  | -0.035 | 0.035 |  | $2.85 \times 10^{11}$ | $7.35 \times 10^{10}$ |
| 31 | 9.49  | -0.079 | 0.079 |  | $6.36 \times 10^{11}$ | $2.97 \times 10^{10}$ |
| 32 | 0.92  | -0.116 | 0.116 |  | $9.62 \times 10^9$    | $1.05 \times 10^8$    |
| 33 | 11.17 | -0.065 | 0.065 |  | $7.25 \times 10^{11}$ | $5.69 \times 10^{10}$ |
| 34 | 1.64  | -0.025 | 0.025 |  | $8.10 \times 10^9$    | $3.01 \times 10^9$    |
| 35 | 2.96  | -0.172 | 0.172 |  | $1.74 \times 10^{11}$ | $2.13 \times 10^8$    |
| 36 | 1.43  | -0.093 | 0.093 |  | $1.75 \times 10^{10}$ | $4.72 \times 10^8$    |
| 37 | 7.35  | -0.101 | 0.101 |  | $5.16 \times 10^{11}$ | $1.01 \times 10^{10}$ |
| 38 | 0.16  | -0.115 | 0.115 |  | $3.05 \times 10^8$    | $3.41 \times 10^6$    |
| 39 | 4.41  | -0.078 | 0.078 |  | $1.37 \times 10^{11}$ | $6.45 \times 10^9$    |
| 40 | 9.17  | -0.058 | 0.058 |  | $4.36 \times 10^{11}$ | $4.59 \times 10^{10}$ |
| 41 | 2.18  | -0.058 | 0.058 |  | $2.47 \times 10^{10}$ | $2.59 \times 10^9$    |
| 42 | 5.66  | -0.026 | 0.026 |  | $9.81 \times 10^{10}$ | $3.52 \times 10^{10}$ |
| 43 | 12.45 | -0.028 | 0.028 |  | $4.85 \times 10^{11}$ | $1.66 \times 10^{11}$ |
| 44 | 5.14  | -0.008 | 0.008 |  | $5.74 \times 10^{10}$ | $4.28 \times 10^{10}$ |
| 45 | 20.45 | -0.032 | 0.032 |  | $1.41 \times 10^{12}$ | $4.09 \times 10^{11}$ |
| 46 | 3.13  | -0.100 | 0.100 |  | $9.28 \times 10^{10}$ | $1.86 \times 10^9$    |
| 47 | 8.62  | -0.041 | 0.041 |  | $2.95 \times 10^{11}$ | $5.92 \times 10^{10}$ |
| 48 | 5.15  | -0.016 | 0.016 |  | $6.78 \times 10^{10}$ | $3.62 \times 10^{10}$ |
| 49 | 3.45  | -0.057 | 0.057 |  | $6.05 \times 10^{10}$ | $6.68 \times 10^9$    |
| 50 | 5.81  | -0.074 | 0.074 |  | $2.24 \times 10^{11}$ | $1.24 \times 10^{10}$ |
| 51 | 10.88 | -0.090 | 0.090 |  | $9.79 \times 10^{11}$ | $2.93 \times 10^{10}$ |
| 52 | 6.58  | -0.051 | 0.051 |  | $2.02 \times 10^{11}$ | $2.75 \times 10^{10}$ |
| 53 | 2.85  | -0.067 | 0.067 |  | $4.87 \times 10^{10}$ | $3.52 \times 10^9$    |
| 54 | 2.03  | -0.073 | 0.073 |  | $2.71 \times 10^{10}$ | $1.55 \times 10^9$    |
| 55 | 1.49  | -0.045 | 0.045 |  | $9.32 \times 10^9$    | $1.64 \times 10^9$    |
| 56 | 33.91 | -0.008 | 0.008 |  | $2.52 \times 10^{12}$ | $1.85 \times 10^{12}$ |
| 57 | 18.21 | -0.063 | 0.063 |  | $1.87 \times 10^{12}$ | $1.59 \times 10^{11}$ |
| 58 | 0.68  | -0.023 | 0.023 |  | $1.34 \times 10^9$    | $5.40 \times 10^8$    |

|    |       |        |       |  |                       |                       |
|----|-------|--------|-------|--|-----------------------|-----------------------|
| 59 | 11.14 | -0.031 | 0.031 |  | $4.15 \times 10^{11}$ | $1.23 \times 10^{11}$ |
| 60 | 12.26 | -0.011 | 0.011 |  | $3.49 \times 10^{11}$ | $2.28 \times 10^{11}$ |
| 61 | 17.48 | -0.115 | 0.115 |  | $3.47 \times 10^{12}$ | $3.88 \times 10^{10}$ |
| 62 | 17.85 | -0.023 | 0.023 |  | $9.13 \times 10^{11}$ | $3.80 \times 10^{11}$ |
| 63 | 0.20  | -0.037 | 0.037 |  | $1.51 \times 10^8$    | $3.54 \times 10^7$    |
| 64 | 32.55 | -0.022 | 0.022 |  | $3.03 \times 10^{12}$ | $1.27 \times 10^{12}$ |
| 65 | 16.21 | -0.023 | 0.023 |  | $7.62 \times 10^{11}$ | $3.09 \times 10^{11}$ |
| 66 | 1.03  | -0.051 | 0.051 |  | $5.01 \times 10^9$    | $6.77 \times 10^8$    |
| 67 | 2.96  | -0.024 | 0.024 |  | $2.59 \times 10^{10}$ | $1.01 \times 10^{10}$ |
| 68 | 9.39  | -0.046 | 0.046 |  | $3.76 \times 10^{11}$ | $6.37 \times 10^{10}$ |
| 69 | 5.09  | -0.005 | 0.005 |  | $5.37 \times 10^{10}$ | $4.42 \times 10^{10}$ |
| 70 | 5.51  | -0.039 | 0.039 |  | $1.16 \times 10^{11}$ | $2.53 \times 10^{10}$ |
| 71 | 11.61 | -0.002 | 0.002 |  | $2.61 \times 10^{11}$ | $2.46 \times 10^{11}$ |
| 72 | 2.20  | -0.014 | 0.014 |  | $1.18 \times 10^{10}$ | $6.85 \times 10^9$    |
| 73 | 1.40  | -0.011 | 0.011 |  | $4.53 \times 10^9$    | $2.99 \times 10^9$    |
| 74 | 38.98 | -0.025 | 0.025 |  | $4.53 \times 10^{12}$ | $1.73 \times 10^{12}$ |
| 75 | 3.95  | -0.011 | 0.011 |  | $3.60 \times 10^{10}$ | $2.37 \times 10^{10}$ |
| 76 | 13.77 | -0.101 | 0.101 |  | $1.80 \times 10^{12}$ | $3.56 \times 10^{10}$ |
| 77 | 1.18  | -0.032 | 0.032 |  | $4.73 \times 10^9$    | $1.34 \times 10^9$    |
| 78 | 10.59 | -0.146 | 0.146 |  | $1.76 \times 10^{12}$ | $5.99 \times 10^9$    |
| 79 | 34.37 | -0.005 | 0.005 |  | $2.44 \times 10^{12}$ | $2.02 \times 10^{12}$ |
| 80 | 7.39  | -0.031 | 0.031 |  | $1.82 \times 10^{11}$ | $5.42 \times 10^{10}$ |
| 81 | 0.78  | -0.002 | 0.002 |  | $1.19 \times 10^9$    | $1.08 \times 10^9$    |
| 82 | 3.51  | -0.027 | 0.027 |  | $3.85 \times 10^{10}$ | $1.32 \times 10^{10}$ |
| 83 | 4.70  | -0.074 | 0.074 |  | $1.45 \times 10^{11}$ | $8.26 \times 10^9$    |
| 84 | 24.98 | -0.142 | 0.142 |  | $9.43 \times 10^{12}$ | $3.76 \times 10^{10}$ |
| 85 | 3.88  | -0.061 | 0.061 |  | $8.26 \times 10^{10}$ | $7.55 \times 10^9$    |
| 86 | 33.70 | -0.002 | 0.002 |  | $2.23 \times 10^{12}$ | $2.05 \times 10^{12}$ |
| 87 | 17.41 | -0.046 | 0.046 |  | $1.30 \times 10^{12}$ | $2.17 \times 10^{11}$ |
| 88 | 9.82  | -0.109 | 0.109 |  | $1.02 \times 10^{12}$ | $1.44 \times 10^{10}$ |
| 89 | 6.33  | -0.033 | 0.033 |  | $1.39 \times 10^{11}$ | $3.79 \times 10^{10}$ |
| 90 | 0.26  | -0.097 | 0.097 |  | $5.90 \times 10^8$    | $1.34 \times 10^7$    |
| 91 | 19.98 | -0.023 | 0.023 |  | $1.15 \times 10^{12}$ | $4.72 \times 10^{11}$ |
| 92 | 4.76  | -0.006 | 0.006 |  | $4.79 \times 10^{10}$ | $3.78 \times 10^{10}$ |
| 93 | 18.57 | -0.036 | 0.036 |  | $1.26 \times 10^{12}$ | $3.06 \times 10^{11}$ |
| 94 | 0.25  | -0.004 | 0.004 |  | $1.28 \times 10^8$    | $1.09 \times 10^8$    |
| 95 | 18.85 | -0.093 | 0.093 |  | $3.04 \times 10^{12}$ | $8.24 \times 10^{10}$ |
| 96 | 0.86  | -0.026 | 0.026 |  | $2.28 \times 10^9$    | $8.26 \times 10^8$    |
| 97 | 2.96  | -0.029 | 0.029 |  | $2.83 \times 10^{10}$ | $9.01 \times 10^9$    |

|     |       |        |       |  |                       |                       |
|-----|-------|--------|-------|--|-----------------------|-----------------------|
| 98  | 3.84  | -0.063 | 0.063 |  | $8.33 \times 10^{10}$ | $7.08 \times 10^9$    |
| 99  | 13.88 | -0.070 | 0.070 |  | $1.21 \times 10^{12}$ | $7.78 \times 10^{10}$ |
| 100 | 4.69  | -0.130 | 0.130 |  | $2.93 \times 10^{11}$ | $1.86 \times 10^9$    |
| 101 | 2.45  | -0.127 | 0.127 |  | $7.78 \times 10^{10}$ | $5.54 \times 10^8$    |
| 102 | 11.81 | -0.039 | 0.039 |  | $5.30 \times 10^{11}$ | $1.17 \times 10^{11}$ |
| 103 | 27.60 | -0.006 | 0.006 |  | $1.61 \times 10^{12}$ | $1.28 \times 10^{12}$ |
| 104 | 1.92  | -0.041 | 0.041 |  | $1.46 \times 10^{10}$ | $2.95 \times 10^9$    |
| 105 | 10.15 | -0.069 | 0.069 |  | $6.33 \times 10^{11}$ | $4.31 \times 10^{10}$ |
| 106 | 1.92  | -0.010 | 0.010 |  | $8.40 \times 10^9$    | $5.71 \times 10^9$    |
| 107 | 10.10 | -0.048 | 0.048 |  | $4.50 \times 10^{11}$ | $7.02 \times 10^{10}$ |
| 108 | 8.08  | -0.054 | 0.054 |  | $3.20 \times 10^{11}$ | $3.85 \times 10^{10}$ |
| 109 | 52.55 | -0.204 | 0.204 |  | $6.77 \times 10^{13}$ | $2.41 \times 10^{10}$ |
| 110 | 6.79  | -0.004 | 0.004 |  | $9.40 \times 10^{10}$ | $8.00 \times 10^{10}$ |
| 111 | 5.23  | -0.152 | 0.152 |  | $4.55 \times 10^{11}$ | $1.23 \times 10^9$    |
| 112 | 2.04  | -0.031 | 0.031 |  | $1.40 \times 10^{10}$ | $4.12 \times 10^9$    |
| 113 | 10.67 | -0.002 | 0.002 |  | $2.22 \times 10^{11}$ | $2.06 \times 10^{11}$ |
| 114 | 14.21 | -0.142 | 0.142 |  | $3.06 \times 10^{12}$ | $1.21 \times 10^{10}$ |
| 115 | 0.89  | -0.154 | 0.154 |  | $1.33 \times 10^{10}$ | $3.34 \times 10^7$    |
| 116 | 1.54  | -0.042 | 0.042 |  | $9.57 \times 10^9$    | $1.84 \times 10^9$    |
| 117 | 23.47 | -0.126 | 0.126 |  | $7.04 \times 10^{12}$ | $5.24 \times 10^{10}$ |
| 118 | 9.52  | -0.014 | 0.014 |  | $2.21 \times 10^{11}$ | $1.30 \times 10^{11}$ |
| 119 | 1.16  | -0.075 | 0.075 |  | $8.98 \times 10^9$    | $4.88 \times 10^8$    |
| 120 | 10.06 | -0.053 | 0.053 |  | $4.88 \times 10^{11}$ | $6.12 \times 10^{10}$ |
| 121 | 3.06  | -0.118 | 0.118 |  | $1.09 \times 10^{11}$ | $1.12 \times 10^9$    |
| 122 | 13.55 | -0.039 | 0.039 |  | $6.96 \times 10^{11}$ | $1.55 \times 10^{11}$ |
| 123 | 12.16 | -0.024 | 0.024 |  | $4.33 \times 10^{11}$ | $1.72 \times 10^{11}$ |
| 124 | 7.95  | -0.104 | 0.104 |  | $6.23 \times 10^{11}$ | $1.10 \times 10^{10}$ |
| 125 | 1.78  | -0.139 | 0.139 |  | $4.67 \times 10^{10}$ | $2.05 \times 10^8$    |
| 126 | 8.91  | -0.064 | 0.064 |  | $4.52 \times 10^{11}$ | $3.76 \times 10^{10}$ |
| 127 | 2.84  | -0.051 | 0.051 |  | $3.75 \times 10^{10}$ | $5.15 \times 10^9$    |
| 128 | 3.81  | -0.010 | 0.010 |  | $3.30 \times 10^{10}$ | $2.25 \times 10^{10}$ |
| 129 | 6.18  | -0.032 | 0.032 |  | $1.29 \times 10^{11}$ | $3.72 \times 10^{10}$ |
| 130 | 26.60 | -0.039 | 0.039 |  | $2.70 \times 10^{12}$ | $5.94 \times 10^{11}$ |
| 131 | 15.63 | -0.044 | 0.044 |  | $1.01 \times 10^{12}$ | $1.85 \times 10^{11}$ |
| 132 | 30.50 | -0.044 | 0.044 |  | $3.88 \times 10^{12}$ | $6.92 \times 10^{11}$ |
| 133 | 0.17  | -0.159 | 0.159 |  | $4.98 \times 10^8$    | $1.04 \times 10^6$    |
| 134 | 10.48 | -0.148 | 0.148 |  | $1.77 \times 10^{12}$ | $5.46 \times 10^9$    |
| 135 | 0.13  | -0.005 | 0.005 |  | $3.41 \times 10^7$    | $2.81 \times 10^7$    |
| 136 | 14.14 | -0.051 | 0.051 |  | $9.32 \times 10^{11}$ | $1.27 \times 10^{11}$ |

|     |       |        |       |  |                       |                       |
|-----|-------|--------|-------|--|-----------------------|-----------------------|
| 137 | 50.10 | -0.021 | 0.021 |  | $6.97 \times 10^{12}$ | $3.11 \times 10^{12}$ |
| 138 | 10.04 | -0.018 | 0.018 |  | $2.68 \times 10^{11}$ | $1.31 \times 10^{11}$ |
| 139 | 8.00  | -0.047 | 0.047 |  | $2.79 \times 10^{11}$ | $4.48 \times 10^{10}$ |
| 140 | 3.85  | -0.033 | 0.033 |  | $5.10 \times 10^{10}$ | $1.42 \times 10^{10}$ |
| 141 | 8.24  | -0.152 | 0.152 |  | $1.13 \times 10^{12}$ | $3.03 \times 10^9$    |
| 142 | 5.46  | -0.103 | 0.103 |  | $2.92 \times 10^{11}$ | $5.22 \times 10^9$    |
| 143 | 19.94 | -0.008 | 0.008 |  | $8.75 \times 10^{11}$ | $6.35 \times 10^{11}$ |
| 144 | 12.26 | -0.160 | 0.160 |  | $2.69 \times 10^{12}$ | $5.30 \times 10^9$    |
| 145 | 37.46 | -0.127 | 0.127 |  | $1.83 \times 10^{13}$ | $1.28 \times 10^{11}$ |
| 146 | 13.29 | -0.011 | 0.011 |  | $4.09 \times 10^{11}$ | $2.68 \times 10^{11}$ |
| 147 | 13.93 | -0.013 | 0.013 |  | $4.65 \times 10^{11}$ | $2.83 \times 10^{11}$ |
| 148 | 23.16 | -0.093 | 0.093 |  | $4.61 \times 10^{12}$ | $1.23 \times 10^{11}$ |
| 149 | 14.34 | -0.135 | 0.135 |  | $2.88 \times 10^{12}$ | $1.53 \times 10^{10}$ |
| 150 | 11.08 | -0.076 | 0.076 |  | $8.35 \times 10^{11}$ | $4.33 \times 10^{10}$ |
| 151 | 5.35  | -0.071 | 0.071 |  | $1.82 \times 10^{11}$ | $1.13 \times 10^{10}$ |
| 152 | 7.19  | -0.043 | 0.043 |  | $2.12 \times 10^{11}$ | $3.95 \times 10^{10}$ |
| 153 | 39.16 | -0.048 | 0.048 |  | $6.75 \times 10^{12}$ | $1.06 \times 10^{12}$ |
| 154 | 5.72  | -0.057 | 0.057 |  | $1.66 \times 10^{11}$ | $1.83 \times 10^{10}$ |
| 155 | 42.67 | -0.049 | 0.049 |  | $8.23 \times 10^{12}$ | $1.21 \times 10^{12}$ |
| 156 | 7.02  | -0.189 | 0.189 |  | $1.10 \times 10^{12}$ | $7.12 \times 10^8$    |
| 157 | 8.41  | -0.051 | 0.051 |  | $3.30 \times 10^{11}$ | $4.49 \times 10^{10}$ |
| 158 | 3.46  | -0.058 | 0.058 |  | $6.20 \times 10^{10}$ | $6.58 \times 10^9$    |
| 159 | 7.50  | -0.066 | 0.066 |  | $3.28 \times 10^{11}$ | $2.56 \times 10^{10}$ |
| 160 | 18.25 | -0.001 | 0.001 |  | $6.36 \times 10^{11}$ | $6.17 \times 10^{11}$ |
| 161 | 27.59 | -0.157 | 0.157 |  | $1.33 \times 10^{13}$ | $2.93 \times 10^{10}$ |
| 162 | 10.46 | -0.047 | 0.047 |  | $4.73 \times 10^{11}$ | $7.74 \times 10^{10}$ |
| 163 | 4.20  | -0.063 | 0.063 |  | $9.84 \times 10^{10}$ | $8.56 \times 10^9$    |
| 164 | 6.21  | -0.049 | 0.049 |  | $1.74 \times 10^{11}$ | $2.57 \times 10^{10}$ |
| 165 | 13.40 | -0.040 | 0.040 |  | $7.02 \times 10^{11}$ | $1.46 \times 10^{11}$ |
| 166 | 18.97 | -0.106 | 0.106 |  | $3.66 \times 10^{12}$ | $5.84 \times 10^{10}$ |
| 167 | 6.42  | -0.062 | 0.062 |  | $2.29 \times 10^{11}$ | $2.02 \times 10^{10}$ |
| 168 | 8.05  | -0.074 | 0.074 |  | $4.26 \times 10^{11}$ | $2.42 \times 10^{10}$ |
| 169 | 6.42  | -0.113 | 0.113 |  | $4.54 \times 10^{11}$ | $5.58 \times 10^9$    |
| 170 | 0.78  | -0.103 | 0.103 |  | $5.94 \times 10^9$    | $1.10 \times 10^8$    |
| 171 | 12.70 | -0.280 | 0.280 |  | $5.02 \times 10^{12}$ | $9.33 \times 10^7$    |
| 172 | 3.86  | -0.121 | 0.121 |  | $1.80 \times 10^{11}$ | $1.63 \times 10^9$    |
| 173 | 24.71 | -0.007 | 0.007 |  | $1.31 \times 10^{12}$ | $1.01 \times 10^{12}$ |
| 174 | 28.10 | -0.101 | 0.101 |  | $7.54 \times 10^{12}$ | $1.47 \times 10^{11}$ |
| 175 | 1.60  | -0.014 | 0.014 |  | $6.32 \times 10^9$    | $3.62 \times 10^9$    |

|     |       |        |       |  |                       |                       |
|-----|-------|--------|-------|--|-----------------------|-----------------------|
| 176 | 7.83  | -0.090 | 0.090 |  | $5.09 \times 10^{11}$ | $1.50 \times 10^{10}$ |
| 177 | 2.82  | -0.040 | 0.040 |  | $3.06 \times 10^{10}$ | $6.55 \times 10^9$    |
| 178 | 24.90 | -0.100 | 0.100 |  | $5.82 \times 10^{12}$ | $1.19 \times 10^{11}$ |
| 179 | 1.08  | -0.140 | 0.140 |  | $1.73 \times 10^{10}$ | $7.44 \times 10^7$    |
| 180 | 4.22  | -0.031 | 0.031 |  | $5.95 \times 10^{10}$ | $1.77 \times 10^{10}$ |
| 181 | 2.46  | -0.020 | 0.020 |  | $1.67 \times 10^{10}$ | $7.55 \times 10^9$    |
| 182 | 1.93  | -0.025 | 0.025 |  | $1.12 \times 10^{10}$ | $4.20 \times 10^9$    |
| 183 | 0.03  | -0.007 | 0.007 |  | $1.46 \times 10^6$    | $1.12 \times 10^6$    |
| 184 | 11.18 | -0.113 | 0.113 |  | $1.38 \times 10^{12}$ | $1.70 \times 10^{10}$ |
| 185 | 12.66 | -0.093 | 0.093 |  | $1.37 \times 10^{12}$ | $3.72 \times 10^{10}$ |
| 186 | 1.99  | -0.137 | 0.137 |  | $5.70 \times 10^{10}$ | $2.78 \times 10^8$    |
| 187 | 29.20 | -0.045 | 0.045 |  | $3.59 \times 10^{12}$ | $6.26 \times 10^{11}$ |
| 188 | 28.63 | -0.037 | 0.037 |  | $3.02 \times 10^{12}$ | $7.18 \times 10^{11}$ |
| 189 | 0.65  | -0.010 | 0.010 |  | $9.68 \times 10^8$    | $6.63 \times 10^8$    |
| 190 | 0.54  | -0.032 | 0.032 |  | $9.92 \times 10^8$    | $2.80 \times 10^8$    |
| 191 | 13.10 | -0.016 | 0.016 |  | $4.39 \times 10^{11}$ | $2.33 \times 10^{11}$ |
| 192 | 2.19  | -0.088 | 0.088 |  | $3.84 \times 10^{10}$ | $1.27 \times 10^9$    |
| 193 | 31.16 | -0.030 | 0.030 |  | $3.19 \times 10^{12}$ | $9.84 \times 10^{11}$ |
| 194 | 26.00 | -0.028 | 0.028 |  | $2.12 \times 10^{12}$ | $7.24 \times 10^{11}$ |
| 195 | 0.55  | -0.014 | 0.014 |  | $7.48 \times 10^8$    | $4.32 \times 10^8$    |
| 196 | 3.60  | -0.022 | 0.022 |  | $3.69 \times 10^{10}$ | $1.56 \times 10^{10}$ |
| 197 | 11.31 | -0.079 | 0.079 |  | $9.12 \times 10^{11}$ | $4.16 \times 10^{10}$ |
| 198 | 34.11 | -0.132 | 0.132 |  | $1.59 \times 10^{13}$ | $9.36 \times 10^{10}$ |
| 199 | 6.96  | -0.044 | 0.044 |  | $2.02 \times 10^{11}$ | $3.60 \times 10^{10}$ |
| 200 | 0.45  | -0.119 | 0.119 |  | $2.33 \times 10^9$    | $2.31 \times 10^7$    |
| 201 | 2.70  | -0.097 | 0.097 |  | $6.58 \times 10^{10}$ | $1.51 \times 10^9$    |
| 202 | 0.08  | -0.084 | 0.084 |  | $5.18 \times 10^7$    | $1.97 \times 10^6$    |
| 203 | 3.48  | -0.104 | 0.104 |  | $1.19 \times 10^{11}$ | $2.11 \times 10^9$    |
| 204 | 23.18 | -0.113 | 0.113 |  | $5.93 \times 10^{12}$ | $7.27 \times 10^{10}$ |
| 205 | 16.01 | -0.002 | 0.002 |  | $5.03 \times 10^{11}$ | $4.62 \times 10^{11}$ |
| 206 | 10.62 | -0.066 | 0.066 |  | $6.60 \times 10^{11}$ | $5.10 \times 10^{10}$ |
| 207 | 12.71 | -0.097 | 0.097 |  | $1.47 \times 10^{12}$ | $3.32 \times 10^{10}$ |
| 208 | 7.30  | -0.076 | 0.076 |  | $3.61 \times 10^{11}$ | $1.89 \times 10^{10}$ |
| 209 | 2.98  | -0.046 | 0.046 |  | $3.81 \times 10^{10}$ | $6.35 \times 10^9$    |
| 210 | 4.19  | -0.095 | 0.095 |  | $1.56 \times 10^{11}$ | $3.80 \times 10^9$    |
| 211 | 10.50 | -0.115 | 0.115 |  | $1.25 \times 10^{12}$ | $1.41 \times 10^{10}$ |
| 212 | 1.48  | -0.034 | 0.034 |  | $7.60 \times 10^9$    | $2.06 \times 10^9$    |
| 213 | 3.00  | -0.133 | 0.133 |  | $1.24 \times 10^{11}$ | $7.05 \times 10^8$    |
| 214 | 2.86  | -0.028 | 0.028 |  | $2.59 \times 10^{10}$ | $8.63 \times 10^9$    |

|      |                  |                    |                   |       |                                |                                |
|------|------------------|--------------------|-------------------|-------|--------------------------------|--------------------------------|
| 215  | 5.06             | -0.045             | 0.045             | 0.289 | $1.07 \times 10^{11}$          | $1.89 \times 10^{10}$          |
| 216  | 32.65            | -0.021             | 0.021             |       | $2.95 \times 10^{12}$          | $1.33 \times 10^{12}$          |
| Avg. | $10.09 \pm 9.97$ | $-0.064 \pm 0.048$ | $0.064 \pm 0.048$ |       | $1.42 \pm 5.11 \times 10^{12}$ | $1.57 \pm 3.97 \times 10^{11}$ |

| BTP-Biso film |                  |                   |             |                     |                          |                       |
|---------------|------------------|-------------------|-------------|---------------------|--------------------------|-----------------------|
| pairs         | $ V_e $<br>(meV) | $\Delta E_e$ (eV) |             | $\lambda_e$<br>(eV) | $k_e$ (s <sup>-1</sup> ) |                       |
|               |                  | small→large       | large→small |                     | small→large              | large→small           |
| 1             | 10.95            | -0.066            | 0.066       | 0.286               | $7.25 \times 10^{11}$    | $5.61 \times 10^{10}$ |
| 2             | 2.53             | -0.006            | 0.006       |                     | $1.40 \times 10^{10}$    | $1.10 \times 10^{10}$ |
| 3             | 17.06            | -0.015            | 0.015       |                     | $7.60 \times 10^{11}$    | $4.16 \times 10^{11}$ |
| 4             | 0.91             | -0.373            | 0.373       |                     | $2.00 \times 10^{10}$    | $9.84 \times 10^3$    |
| 5             | 10.28            | -0.006            | 0.006       |                     | $2.31 \times 10^{11}$    | $1.83 \times 10^{11}$ |
| 6             | 2.61             | -0.063            | 0.063       |                     | $3.96 \times 10^{10}$    | $3.40 \times 10^9$    |
| 7             | 9.76             | -0.028            | 0.028       |                     | $3.10 \times 10^{11}$    | $1.05 \times 10^{11}$ |
| 8             | 1.55             | -0.043            | 0.043       |                     | $1.02 \times 10^{10}$    | $1.90 \times 10^9$    |
| 9             | 9.63             | -0.036            | 0.036       |                     | $3.50 \times 10^{11}$    | $8.53 \times 10^{10}$ |
| 10            | 1.38             | -0.077            | 0.077       |                     | $1.36 \times 10^{10}$    | $6.89 \times 10^8$    |
| 11            | 1.39             | -0.066            | 0.066       |                     | $1.17 \times 10^{10}$    | $9.00 \times 10^8$    |
| 12            | 14.33            | -0.043            | 0.043       |                     | $8.74 \times 10^{11}$    | $1.61 \times 10^{11}$ |
| 13            | 0.33             | -0.042            | 0.042       |                     | $4.42 \times 10^8$       | $8.71 \times 10^7$    |
| 14            | 4.66             | -0.036            | 0.036       |                     | $8.23 \times 10^{10}$    | $2.00 \times 10^{10}$ |
| 15            | 11.80            | -0.053            | 0.053       |                     | $6.97 \times 10^{11}$    | $8.69 \times 10^{10}$ |
| 16            | 16.71            | -0.024            | 0.024       |                     | $8.58 \times 10^{11}$    | $3.31 \times 10^{11}$ |
| 17            | 11.16            | -0.122            | 0.122       |                     | $1.56 \times 10^{12}$    | $1.37 \times 10^{10}$ |
| 18            | 8.80             | -0.113            | 0.113       |                     | $8.78 \times 10^{11}$    | $1.09 \times 10^{10}$ |
| 19            | 1.70             | -0.178            | 0.178       |                     | $6.11 \times 10^{10}$    | $6.08 \times 10^7$    |
| 20            | 14.91            | -0.106            | 0.106       |                     | $2.33 \times 10^{12}$    | $3.72 \times 10^{10}$ |
| 21            | 13.29            | -0.050            | 0.050       |                     | $8.38 \times 10^{11}$    | $1.19 \times 10^{11}$ |
| 22            | 7.65             | -0.001            | 0.001       |                     | $1.17 \times 10^{11}$    | $1.11 \times 10^{11}$ |
| 23            | 4.72             | -0.090            | 0.090       |                     | $1.89 \times 10^{11}$    | $5.75 \times 10^9$    |
| 24            | 5.08             | -0.051            | 0.051       |                     | $1.25 \times 10^{11}$    | $1.69 \times 10^{10}$ |
| 25            | 0.73             | -0.069            | 0.069       |                     | $3.40 \times 10^9$       | $2.29 \times 10^8$    |
| 26            | 7.93             | -0.024            | 0.024       |                     | $1.91 \times 10^{11}$    | $7.59 \times 10^{10}$ |
| 27            | 8.23             | -0.045            | 0.045       |                     | $2.97 \times 10^{11}$    | $5.11 \times 10^{10}$ |
| 28            | 0.93             | -0.069            | 0.069       |                     | $5.50 \times 10^9$       | $3.73 \times 10^8$    |
| 29            | 9.77             | -0.011            | 0.011       |                     | $2.31 \times 10^{11}$    | $1.49 \times 10^{11}$ |
| 30            | 18.73            | -0.078            | 0.078       |                     | $2.54 \times 10^{12}$    | $1.21 \times 10^{11}$ |
| 31            | 9.83             | -0.028            | 0.028       |                     | $3.17 \times 10^{11}$    | $1.06 \times 10^{11}$ |
| 32            | 1.10             | -0.049            | 0.049       |                     | $5.64 \times 10^9$       | $8.33 \times 10^8$    |

|    |       |        |       |  |                       |                       |
|----|-------|--------|-------|--|-----------------------|-----------------------|
| 33 | 6.41  | -0.129 | 0.129 |  | $5.59 \times 10^{11}$ | $3.71 \times 10^9$    |
| 34 | 6.72  | -0.074 | 0.074 |  | $3.07 \times 10^{11}$ | $1.74 \times 10^{10}$ |
| 35 | 19.12 | -0.117 | 0.117 |  | $4.35 \times 10^{12}$ | $4.61 \times 10^{10}$ |
| 36 | 17.13 | -0.045 | 0.045 |  | $1.28 \times 10^{12}$ | $2.24 \times 10^{11}$ |
| 37 | 0.43  | -0.046 | 0.046 |  | $8.09 \times 10^8$    | $1.33 \times 10^8$    |
| 38 | 45.96 | -0.109 | 0.109 |  | $2.28 \times 10^{13}$ | $3.33 \times 10^{11}$ |
| 39 | 3.41  | -0.041 | 0.041 |  | $4.77 \times 10^{10}$ | $9.62 \times 10^9$    |
| 40 | 5.83  | -0.055 | 0.055 |  | $1.74 \times 10^{11}$ | $2.05 \times 10^{10}$ |
| 41 | 20.15 | -0.056 | 0.056 |  | $2.10 \times 10^{12}$ | $2.41 \times 10^{11}$ |
| 42 | 9.87  | -0.120 | 0.120 |  | $1.20 \times 10^{12}$ | $1.12 \times 10^{10}$ |
| 43 | 9.12  | -0.074 | 0.074 |  | $5.66 \times 10^{11}$ | $3.21 \times 10^{10}$ |
| 44 | 4.38  | -0.014 | 0.014 |  | $4.86 \times 10^{10}$ | $2.83 \times 10^{10}$ |
| 45 | 0.53  | -0.083 | 0.083 |  | $2.16 \times 10^9$    | $8.54 \times 10^7$    |
| 46 | 3.23  | -0.012 | 0.012 |  | $2.54 \times 10^{10}$ | $1.61 \times 10^{10}$ |
| 47 | 6.14  | -0.015 | 0.015 |  | $9.78 \times 10^{10}$ | $5.43 \times 10^{10}$ |
| 48 | 16.93 | -0.196 | 0.196 |  | $6.86 \times 10^{12}$ | $3.29 \times 10^9$    |
| 49 | 5.78  | -0.123 | 0.123 |  | $4.25 \times 10^{11}$ | $3.56 \times 10^9$    |
| 50 | 17.30 | -0.085 | 0.085 |  | $2.37 \times 10^{12}$ | $8.81 \times 10^{10}$ |
| 51 | 12.78 | -0.021 | 0.021 |  | $4.72 \times 10^{11}$ | $2.08 \times 10^{11}$ |
| 52 | 9.99  | -0.085 | 0.085 |  | $7.97 \times 10^{11}$ | $2.90 \times 10^{10}$ |
| 53 | 4.61  | -0.001 | 0.001 |  | $4.22 \times 10^{10}$ | $4.08 \times 10^{10}$ |
| 54 | 35.49 | -0.008 | 0.008 |  | $2.84 \times 10^{12}$ | $2.12 \times 10^{12}$ |
| 55 | 23.15 | -0.062 | 0.062 |  | $3.07 \times 10^{12}$ | $2.73 \times 10^{11}$ |
| 56 | 2.34  | -0.070 | 0.070 |  | $3.51 \times 10^{10}$ | $2.32 \times 10^9$    |
| 57 | 4.30  | -0.001 | 0.001 |  | $3.65 \times 10^{10}$ | $3.56 \times 10^{10}$ |
| 58 | 2.52  | -0.038 | 0.038 |  | $2.47 \times 10^{10}$ | $5.64 \times 10^9$    |
| 59 | 21.11 | -0.125 | 0.125 |  | $5.82 \times 10^{12}$ | $4.46 \times 10^{10}$ |
| 60 | 4.30  | -0.064 | 0.064 |  | $1.10 \times 10^{11}$ | $8.89 \times 10^9$    |
| 61 | 15.07 | -0.123 | 0.123 |  | $2.90 \times 10^{12}$ | $2.41 \times 10^{10}$ |
| 62 | 12.02 | -0.071 | 0.071 |  | $9.45 \times 10^{11}$ | $5.96 \times 10^{10}$ |
| 63 | 3.27  | -0.084 | 0.084 |  | $8.39 \times 10^{10}$ | $3.21 \times 10^9$    |
| 64 | 2.14  | -0.006 | 0.006 |  | $1.00 \times 10^{10}$ | $7.88 \times 10^9$    |
| 65 | 12.70 | -0.069 | 0.069 |  | $1.03 \times 10^{12}$ | $6.92 \times 10^{10}$ |
| 66 | 6.70  | -0.015 | 0.015 |  | $1.15 \times 10^{11}$ | $6.53 \times 10^{10}$ |
| 67 | 16.66 | -0.012 | 0.012 |  | $6.80 \times 10^{11}$ | $4.26 \times 10^{11}$ |
| 68 | 7.55  | -0.084 | 0.084 |  | $4.50 \times 10^{11}$ | $1.69 \times 10^{10}$ |
| 69 | 4.95  | -0.050 | 0.050 |  | $1.16 \times 10^{11}$ | $1.65 \times 10^{10}$ |
| 70 | 7.30  | -0.011 | 0.011 |  | $1.29 \times 10^{11}$ | $8.30 \times 10^{10}$ |
| 71 | 17.14 | -0.004 | 0.004 |  | $6.17 \times 10^{11}$ | $5.30 \times 10^{11}$ |

|     |       |        |       |  |                       |                       |
|-----|-------|--------|-------|--|-----------------------|-----------------------|
| 72  | 1.06  | -0.080 | 0.080 |  | $8.32 \times 10^9$    | $3.72 \times 10^8$    |
| 73  | 2.72  | -0.144 | 0.144 |  | $1.17 \times 10^{11}$ | $4.34 \times 10^8$    |
| 74  | 9.31  | -0.085 | 0.085 |  | $6.93 \times 10^{11}$ | $2.52 \times 10^{10}$ |
| 75  | 2.11  | -0.006 | 0.006 |  | $9.74 \times 10^9$    | $7.64 \times 10^9$    |
| 76  | 4.38  | -0.037 | 0.037 |  | $7.36 \times 10^{10}$ | $1.73 \times 10^{10}$ |
| 77  | 34.71 | -0.008 | 0.008 |  | $2.72 \times 10^{12}$ | $2.02 \times 10^{12}$ |
| 78  | 3.27  | -0.002 | 0.002 |  | $2.19 \times 10^{10}$ | $2.00 \times 10^{10}$ |
| 79  | 0.22  | -0.023 | 0.023 |  | $1.46 \times 10^8$    | $6.02 \times 10^7$    |
| 80  | 10.30 | -0.113 | 0.113 |  | $1.21 \times 10^{12}$ | $1.47 \times 10^{10}$ |
| 81  | 19.21 | 0.000  | 0.000 |  | $7.25 \times 10^{11}$ | $7.15 \times 10^{11}$ |
| 82  | 4.19  | -0.011 | 0.011 |  | $4.18 \times 10^{10}$ | $2.77 \times 10^{10}$ |
| 83  | 20.58 | -0.182 | 0.182 |  | $9.25 \times 10^{12}$ | $7.66 \times 10^9$    |
| 84  | 28.37 | -0.125 | 0.125 |  | $1.05 \times 10^{13}$ | $8.04 \times 10^{10}$ |
| 85  | 8.41  | -0.036 | 0.036 |  | $2.65 \times 10^{11}$ | $6.58 \times 10^{10}$ |
| 86  | 10.75 | -0.067 | 0.067 |  | $7.13 \times 10^{11}$ | $5.23 \times 10^{10}$ |
| 87  | 2.47  | -0.091 | 0.091 |  | $5.26 \times 10^{10}$ | $1.55 \times 10^9$    |
| 88  | 22.14 | -0.015 | 0.015 |  | $1.26 \times 10^{12}$ | $7.13 \times 10^{11}$ |
| 89  | 24.73 | -0.071 | 0.071 |  | $4.02 \times 10^{12}$ | $2.50 \times 10^{11}$ |
| 90  | 14.76 | -0.112 | 0.112 |  | $2.46 \times 10^{12}$ | $3.09 \times 10^{10}$ |
| 91  | 2.88  | -0.060 | 0.060 |  | $4.62 \times 10^{10}$ | $4.40 \times 10^9$    |
| 92  | 9.38  | -0.090 | 0.090 |  | $7.52 \times 10^{11}$ | $2.24 \times 10^{10}$ |
| 93  | 21.94 | -0.064 | 0.064 |  | $2.85 \times 10^{12}$ | $2.33 \times 10^{11}$ |
| 94  | 2.38  | -0.023 | 0.023 |  | $1.71 \times 10^{10}$ | $6.86 \times 10^9$    |
| 95  | 7.41  | -0.052 | 0.052 |  | $2.68 \times 10^{11}$ | $3.54 \times 10^{10}$ |
| 96  | 1.60  | -0.051 | 0.051 |  | $1.23 \times 10^{10}$ | $1.71 \times 10^9$    |
| 97  | 16.01 | -0.045 | 0.045 |  | $1.12 \times 10^{12}$ | $1.94 \times 10^{11}$ |
| 98  | 2.08  | -0.054 | 0.054 |  | $2.19 \times 10^{10}$ | $2.64 \times 10^9$    |
| 99  | 8.54  | -0.145 | 0.145 |  | $1.16 \times 10^{12}$ | $4.17 \times 10^9$    |
| 100 | 0.19  | -0.128 | 0.128 |  | $5.00 \times 10^8$    | $3.45 \times 10^6$    |
| 101 | 9.91  | -0.094 | 0.094 |  | $8.88 \times 10^{11}$ | $2.25 \times 10^{10}$ |
| 102 | 6.04  | -0.090 | 0.090 |  | $3.11 \times 10^{11}$ | $9.37 \times 10^9$    |
| 103 | 3.76  | -0.054 | 0.054 |  | $7.10 \times 10^{10}$ | $8.83 \times 10^9$    |
| 104 | 4.93  | -0.018 | 0.018 |  | $6.71 \times 10^{10}$ | $3.27 \times 10^{10}$ |
| 105 | 1.67  | -0.014 | 0.014 |  | $7.13 \times 10^9$    | $4.13 \times 10^9$    |
| 106 | 9.90  | -0.045 | 0.045 |  | $4.29 \times 10^{11}$ | $7.41 \times 10^{10}$ |
| 107 | 11.82 | -0.008 | 0.008 |  | $3.17 \times 10^{11}$ | $2.33 \times 10^{11}$ |
| 108 | 22.89 | -0.064 | 0.064 |  | $3.10 \times 10^{12}$ | $2.54 \times 10^{11}$ |
| 109 | 3.91  | -0.429 | 0.429 |  | $2.39 \times 10^{11}$ | $1.35 \times 10^4$    |
| 110 | 8.28  | -0.058 | 0.058 |  | $3.71 \times 10^{11}$ | $3.82 \times 10^{10}$ |

|      |               |                  |                 |       |                                |                                |
|------|---------------|------------------|-----------------|-------|--------------------------------|--------------------------------|
| 111  | 4.85          | -0.003           | 0.003           |       | $4.86 \times 10^{10}$          | $4.32 \times 10^{10}$          |
| 112  | 10.14         | -0.037           | 0.037           |       | $3.91 \times 10^{11}$          | $9.38 \times 10^{10}$          |
| 113  | 1.55          | -0.084           | 0.084           |       | $1.88 \times 10^{10}$          | $7.22 \times 10^8$             |
| 114  | 2.71          | -0.044           | 0.044           |       | $3.19 \times 10^{10}$          | $5.66 \times 10^9$             |
| 115  | 14.84         | -0.127           | 0.127           |       | $2.93 \times 10^{12}$          | $2.11 \times 10^{10}$          |
| 116  | 40.01         | -0.059           | 0.059           |       | $8.77 \times 10^{12}$          | $8.73 \times 10^{11}$          |
| 117  | 15.22         | -0.222           | 0.222           |       | $6.33 \times 10^{12}$          | $1.13 \times 10^9$             |
| 118  | 8.76          | -0.019           | 0.019           |       | $2.12 \times 10^{11}$          | $1.03 \times 10^{11}$          |
| 119  | 5.96          | -0.067           | 0.067           |       | $2.20 \times 10^{11}$          | $1.61 \times 10^{10}$          |
| 120  | 0.57          | -0.036           | 0.036           |       | $1.21 \times 10^9$             | $2.98 \times 10^8$             |
| 121  | 14.23         | -0.032           | 0.032           |       | $7.12 \times 10^{11}$          | $2.04 \times 10^{11}$          |
| 122  | 0.40          | -0.002           | 0.002           |       | $3.14 \times 10^8$             | $2.96 \times 10^8$             |
| 123  | 8.41          | -0.123           | 0.123           |       | $9.07 \times 10^{11}$          | $7.42 \times 10^9$             |
| 124  | 13.88         | -0.070           | 0.070           |       | $1.25 \times 10^{12}$          | $8.07 \times 10^{10}$          |
| 125  | 25.75         | -0.032           | 0.032           |       | $2.31 \times 10^{12}$          | $6.75 \times 10^{11}$          |
| Avg. | 9.69±<br>8.51 | -0.066±<br>0.062 | 0.066±<br>0.062 | 0.286 | 1.19±<br>$2.67 \times 10^{12}$ | 1.19±<br>$2.93 \times 10^{11}$ |

**Table S4.** Fractions of acceptor\_acceptor  $\pi$ - $\pi$  packing pairs with different orders of magnitude in the electron transfer rates for the BTP-B, BTP-Bme, and BTP-Biso films. Here, “small→large” means electron transfer from an acceptor with a smaller EA to one with a larger EA, and “large→small” means the reverse process.

| electron transfer rate<br>[s <sup>-1</sup> ] | BTP-B           |                 | BTP-Bme         |                 | BTP-Biso        |                 |
|----------------------------------------------|-----------------|-----------------|-----------------|-----------------|-----------------|-----------------|
|                                              | small→<br>large | large→<br>small | small→<br>large | large→<br>small | small→<br>large | large→<br>small |
| $\geq 10^{13}$                               | 6.43%           |                 | 1.85%           |                 | 1.60%           |                 |
| $\geq 10^{12}$                               | 29.6%           | 5.00%           | 25.5%           | 5.09%           | 24.8%           | 1.60%           |
| $\geq 10^{11}$                               | 69.3%           | 31.4%           | 63.9%           | 23.2%           | 64.8%           | 24.0%           |
| $\geq 10^{10}$                               | 86.8%           | 60.7%           | 86.6%           | 61.6%           | 89.6%           | 64.8%           |
| $\geq 10^9$                                  |                 | 83.6%           |                 | 86.1%           |                 | 85.6%           |

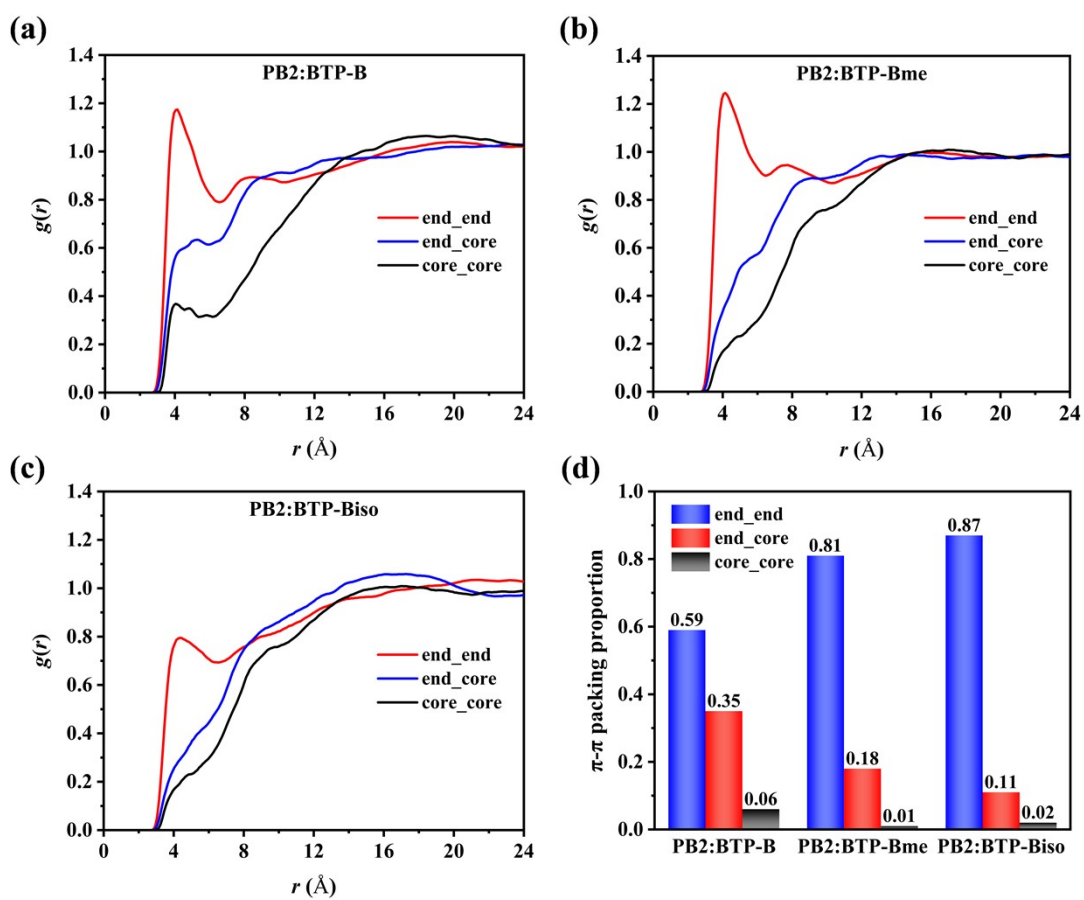

**Figure S3.** (a-c) Radial distribution functions for the acceptor end\_end, end\_core, and core\_core interactions; and (d) end\_end, end\_core and core\_core  $\pi$ - $\pi$  packing fractions in the MD-simulated PB2:BTP-B, PB2:BTP-Bme, and PB2:BTP-Biso blends.

**Table S5.** Intermolecular electron transfer rates,  $k_e$ , for the 143 BTP-B\_BTP-B, 101 BTP-Bme\_BTP-Bme, and 53 BTP-Biso\_BTP-Biso  $\pi$ - $\pi$  packing pairs extracted from the MD-simulated PB2:BTP-B, PB2:BTP-Bme, and PB2:BTP-Biso blends. Here, “small→large” means electron transfer from an acceptor with a smaller EA to one with a larger EA, and “large→small” means the reverse process.

| PB2:BTP-B blend |                  |                   |             |                     |                          |                       |
|-----------------|------------------|-------------------|-------------|---------------------|--------------------------|-----------------------|
| pairs           | $ V_e $<br>(meV) | $\Delta E_e$ (eV) |             | $\lambda_e$<br>(eV) | $k_e$ (s <sup>-1</sup> ) |                       |
|                 |                  | small→large       | large→small |                     | small→large              | large→small           |
| 1               | 5.94             | -0.008            | 0.008       | 0.294               | $7.23 \times 10^{10}$    | $5.39 \times 10^{10}$ |
| 2               | 22.62            | -0.050            | 0.050       |                     | $2.21 \times 10^{12}$    | $3.16 \times 10^{11}$ |
| 3               | 7.46             | -0.184            | 0.184       |                     | $1.15 \times 10^{12}$    | $9.00 \times 10^8$    |
| 4               | 11.58            | -0.026            | 0.026       |                     | $3.85 \times 10^{11}$    | $1.41 \times 10^{11}$ |
| 5               | 18.29            | -0.053            | 0.053       |                     | $1.52 \times 10^{12}$    | $1.92 \times 10^{11}$ |
| 6               | 5.69             | -0.084            | 0.084       |                     | $2.32 \times 10^{11}$    | $8.99 \times 10^9$    |
| 7               | 0.98             | -0.124            | 0.124       |                     | $1.15 \times 10^{10}$    | $9.32 \times 10^7$    |
| 8               | 17.48            | -0.042            | 0.042       |                     | $1.15 \times 10^{12}$    | $2.28 \times 10^{11}$ |
| 9               | 29.68            | -0.008            | 0.008       |                     | $1.81 \times 10^{12}$    | $1.35 \times 10^{12}$ |
| 10              | 7.98             | -0.063            | 0.063       |                     | $3.38 \times 10^{11}$    | $2.90 \times 10^{10}$ |
| 11              | 12.37            | -0.076            | 0.076       |                     | $9.83 \times 10^{11}$    | $5.12 \times 10^{10}$ |
| 12              | 12.49            | -0.128            | 0.128       |                     | $1.94 \times 10^{12}$    | $1.33 \times 10^{10}$ |
| 13              | 7.95             | -0.026            | 0.026       |                     | $1.82 \times 10^{11}$    | $6.59 \times 10^{10}$ |
| 14              | 10.31            | -0.038            | 0.038       |                     | $3.79 \times 10^{11}$    | $8.50 \times 10^{10}$ |
| 15              | 0.78             | -0.085            | 0.085       |                     | $4.44 \times 10^9$       | $1.60 \times 10^8$    |
| 16              | 8.59             | -0.162            | 0.162       |                     | $1.28 \times 10^{12}$    | $2.37 \times 10^9$    |
| 17              | 14.25            | -0.038            | 0.038       |                     | $7.23 \times 10^{11}$    | $1.63 \times 10^{11}$ |
| 18              | 6.03             | -0.076            | 0.076       |                     | $2.32 \times 10^{11}$    | $1.23 \times 10^{10}$ |
| 19              | 1.88             | -0.116            | 0.116       |                     | $3.86 \times 10^{10}$    | $4.21 \times 10^8$    |
| 20              | 18.74            | -0.103            | 0.103       |                     | $3.24 \times 10^{12}$    | $5.95 \times 10^{10}$ |
| 21              | 4.89             | -0.013            | 0.013       |                     | $5.41 \times 10^{10}$    | $3.28 \times 10^{10}$ |
| 22              | 1.48             | -0.027            | 0.027       |                     | $6.34 \times 10^9$       | $2.27 \times 10^9$    |
| 23              | 13.31            | -0.043            | 0.043       |                     | $6.79 \times 10^{11}$    | $1.29 \times 10^{11}$ |
| 24              | 8.60             | -0.014            | 0.014       |                     | $1.72 \times 10^{11}$    | $9.87 \times 10^{10}$ |
| 25              | 3.02             | -0.103            | 0.103       |                     | $8.46 \times 10^{10}$    | $1.52 \times 10^9$    |
| 26              | 4.14             | -0.106            | 0.106       |                     | $1.64 \times 10^{11}$    | $2.68 \times 10^9$    |
| 27              | 13.48            | -0.006            | 0.006       |                     | $3.58 \times 10^{11}$    | $2.90 \times 10^{11}$ |
| 28              | 9.01             | -0.038            | 0.038       |                     | $2.90 \times 10^{11}$    | $6.50 \times 10^{10}$ |
| 29              | 19.28            | -0.019            | 0.019       |                     | $9.35 \times 10^{11}$    | $4.55 \times 10^{11}$ |
| 30              | 5.76             | -0.032            | 0.032       |                     | $1.06 \times 10^{11}$    | $3.06 \times 10^{10}$ |
| 31              | 25.61            | -0.126            | 0.126       |                     | $7.94 \times 10^{12}$    | $6.00 \times 10^{10}$ |

|    |       |        |       |  |                       |                       |
|----|-------|--------|-------|--|-----------------------|-----------------------|
| 32 | 13.84 | -0.053 | 0.053 |  | $8.71 \times 10^{11}$ | $1.10 \times 10^{11}$ |
| 33 | 5.22  | -0.109 | 0.109 |  | $2.74 \times 10^{11}$ | $3.87 \times 10^9$    |
| 34 | 5.57  | -0.050 | 0.050 |  | $1.35 \times 10^{11}$ | $1.91 \times 10^{10}$ |
| 35 | 26.73 | -0.020 | 0.020 |  | $1.86 \times 10^{12}$ | $8.42 \times 10^{11}$ |
| 36 | 0.91  | -0.037 | 0.037 |  | $2.91 \times 10^9$    | $6.81 \times 10^8$    |
| 37 | 9.65  | -0.002 | 0.002 |  | $1.73 \times 10^{11}$ | $1.58 \times 10^{11}$ |
| 38 | 6.91  | -0.157 | 0.157 |  | $7.93 \times 10^{11}$ | $1.79 \times 10^9$    |
| 39 | 21.79 | -0.010 | 0.010 |  | $1.02 \times 10^{12}$ | $6.89 \times 10^{11}$ |
| 40 | 46.56 | -0.054 | 0.054 |  | $9.98 \times 10^{12}$ | $1.22 \times 10^{12}$ |
| 41 | 5.52  | -0.072 | 0.072 |  | $1.86 \times 10^{11}$ | $1.11 \times 10^{10}$ |
| 42 | 3.88  | -0.041 | 0.041 |  | $5.55 \times 10^{10}$ | $1.15 \times 10^{10}$ |
| 43 | 4.33  | 0.000  | 0.000 |  | $3.34 \times 10^{10}$ | $3.30 \times 10^{10}$ |
| 44 | 16.25 | -0.065 | 0.065 |  | $1.43 \times 10^{12}$ | $1.16 \times 10^{11}$ |
| 45 | 7.42  | -0.027 | 0.027 |  | $1.60 \times 10^{11}$ | $5.68 \times 10^{10}$ |
| 46 | 1.68  | -0.203 | 0.203 |  | $6.67 \times 10^{10}$ | $2.47 \times 10^7$    |
| 47 | 14.00 | -0.082 | 0.082 |  | $1.37 \times 10^{12}$ | $5.69 \times 10^{10}$ |
| 48 | 14.59 | -0.069 | 0.069 |  | $1.24 \times 10^{12}$ | $8.39 \times 10^{10}$ |
| 49 | 5.30  | -0.006 | 0.006 |  | $5.59 \times 10^{10}$ | $4.42 \times 10^{10}$ |
| 50 | 2.35  | -0.021 | 0.021 |  | $1.47 \times 10^{10}$ | $6.36 \times 10^9$    |
| 51 | 0.96  | -0.149 | 0.149 |  | $1.43 \times 10^{10}$ | $4.35 \times 10^7$    |
| 52 | 16.63 | -0.044 | 0.044 |  | $1.07 \times 10^{12}$ | $1.98 \times 10^{11}$ |
| 53 | 7.05  | -0.078 | 0.078 |  | $3.29 \times 10^{11}$ | $1.58 \times 10^{10}$ |
| 54 | 17.82 | -0.027 | 0.027 |  | $9.28 \times 10^{11}$ | $3.26 \times 10^{11}$ |
| 55 | 12.27 | -0.197 | 0.197 |  | $3.42 \times 10^{12}$ | $1.59 \times 10^9$    |
| 56 | 8.95  | -0.015 | 0.015 |  | $1.87 \times 10^{11}$ | $1.06 \times 10^{11}$ |
| 57 | 20.19 | -0.010 | 0.010 |  | $8.72 \times 10^{11}$ | $5.95 \times 10^{11}$ |
| 58 | 25.26 | -0.137 | 0.137 |  | $8.74 \times 10^{12}$ | $4.24 \times 10^{10}$ |
| 59 | 0.59  | -0.144 | 0.144 |  | $5.12 \times 10^9$    | $1.88 \times 10^7$    |
| 60 | 15.28 | -0.022 | 0.022 |  | $6.27 \times 10^{11}$ | $2.65 \times 10^{11}$ |
| 61 | 5.15  | -0.059 | 0.059 |  | $1.31 \times 10^{11}$ | $1.34 \times 10^{10}$ |
| 62 | 4.13  | -0.048 | 0.048 |  | $7.17 \times 10^{10}$ | $1.09 \times 10^{10}$ |
| 63 | 3.64  | -0.055 | 0.055 |  | $6.15 \times 10^{10}$ | $7.38 \times 10^9$    |
| 64 | 4.76  | -0.002 | 0.002 |  | $4.15 \times 10^{10}$ | $3.89 \times 10^{10}$ |
| 65 | 0.86  | -0.047 | 0.047 |  | $2.99 \times 10^9$    | $4.87 \times 10^8$    |
| 66 | 2.32  | -0.165 | 0.165 |  | $9.62 \times 10^{10}$ | $1.54 \times 10^8$    |
| 67 | 1.08  | -0.067 | 0.067 |  | $6.60 \times 10^9$    | $4.91 \times 10^8$    |
| 68 | 1.36  | -0.009 | 0.009 |  | $3.96 \times 10^9$    | $2.75 \times 10^9$    |
| 69 | 27.34 | -0.163 | 0.163 |  | $1.32 \times 10^{13}$ | $2.29 \times 10^{10}$ |
| 70 | 10.47 | -0.026 | 0.026 |  | $3.13 \times 10^{11}$ | $1.16 \times 10^{11}$ |

|     |       |        |       |  |                       |                       |
|-----|-------|--------|-------|--|-----------------------|-----------------------|
| 71  | 13.51 | -0.070 | 0.070 |  | $1.07 \times 10^{12}$ | $7.06 \times 10^{10}$ |
| 72  | 11.78 | -0.009 | 0.009 |  | $2.92 \times 10^{11}$ | $2.07 \times 10^{11}$ |
| 73  | 5.94  | -0.050 | 0.050 |  | $1.53 \times 10^{11}$ | $2.18 \times 10^{10}$ |
| 74  | 10.71 | 0.000  | 0.000 |  | $2.03 \times 10^{11}$ | $2.04 \times 10^{11}$ |
| 75  | 6.31  | -0.095 | 0.095 |  | $3.31 \times 10^{11}$ | $8.32 \times 10^9$    |
| 76  | 8.30  | -0.174 | 0.174 |  | $1.32 \times 10^{12}$ | $1.52 \times 10^9$    |
| 77  | 4.65  | -0.168 | 0.168 |  | $3.97 \times 10^{11}$ | $5.74 \times 10^8$    |
| 78  | 7.16  | -0.082 | 0.082 |  | $3.57 \times 10^{11}$ | $1.49 \times 10^{10}$ |
| 79  | 0.41  | -0.112 | 0.112 |  | $1.71 \times 10^9$    | $2.22 \times 10^7$    |
| 80  | 4.96  | -0.127 | 0.127 |  | $3.01 \times 10^{11}$ | $2.19 \times 10^9$    |
| 81  | 3.92  | -0.021 | 0.021 |  | $4.04 \times 10^{10}$ | $1.79 \times 10^{10}$ |
| 82  | 2.25  | -0.108 | 0.108 |  | $5.01 \times 10^{10}$ | $7.38 \times 10^8$    |
| 83  | 17.76 | -0.120 | 0.120 |  | $3.57 \times 10^{12}$ | $3.39 \times 10^{10}$ |
| 84  | 27.45 | -0.041 | 0.041 |  | $2.80 \times 10^{12}$ | $5.72 \times 10^{11}$ |
| 85  | 1.31  | 0.000  | 0.000 |  | $3.06 \times 10^9$    | $3.02 \times 10^9$    |
| 86  | 6.46  | -0.055 | 0.055 |  | $1.94 \times 10^{11}$ | $2.32 \times 10^{10}$ |
| 87  | 28.39 | -0.030 | 0.030 |  | $2.50 \times 10^{12}$ | $7.70 \times 10^{11}$ |
| 88  | 14.52 | -0.019 | 0.019 |  | $5.38 \times 10^{11}$ | $2.54 \times 10^{11}$ |
| 89  | 3.18  | -0.051 | 0.051 |  | $4.40 \times 10^{10}$ | $6.15 \times 10^9$    |
| 90  | 1.54  | -0.058 | 0.058 |  | $1.16 \times 10^{10}$ | $1.22 \times 10^9$    |
| 91  | 4.94  | -0.068 | 0.068 |  | $1.40 \times 10^{11}$ | $9.87 \times 10^9$    |
| 92  | 17.44 | -0.011 | 0.011 |  | $6.62 \times 10^{11}$ | $4.37 \times 10^{11}$ |
| 93  | 21.18 | -0.046 | 0.046 |  | $1.82 \times 10^{12}$ | $3.02 \times 10^{11}$ |
| 94  | 3.45  | -0.054 | 0.054 |  | $5.43 \times 10^{10}$ | $6.78 \times 10^9$    |
| 95  | 0.36  | -0.021 | 0.021 |  | $3.46 \times 10^8$    | $1.53 \times 10^8$    |
| 96  | 13.14 | -0.099 | 0.099 |  | $1.53 \times 10^{12}$ | $3.20 \times 10^{10}$ |
| 97  | 16.78 | -0.183 | 0.183 |  | $5.82 \times 10^{12}$ | $4.61 \times 10^9$    |
| 98  | 7.75  | -0.014 | 0.014 |  | $1.38 \times 10^{11}$ | $8.14 \times 10^{10}$ |
| 99  | 31.83 | -0.075 | 0.075 |  | $6.43 \times 10^{12}$ | $3.46 \times 10^{11}$ |
| 100 | 3.58  | -0.006 | 0.006 |  | $2.57 \times 10^{10}$ | $2.00 \times 10^{10}$ |
| 101 | 1.73  | -0.015 | 0.015 |  | $7.04 \times 10^9$    | $3.93 \times 10^9$    |
| 102 | 20.07 | -0.155 | 0.155 |  | $6.59 \times 10^{12}$ | $1.58 \times 10^{10}$ |
| 103 | 2.08  | -0.009 | 0.009 |  | $9.12 \times 10^9$    | $6.44 \times 10^9$    |
| 104 | 0.97  | -0.195 | 0.195 |  | $2.12 \times 10^{10}$ | $1.07 \times 10^7$    |
| 105 | 3.63  | -0.053 | 0.053 |  | $5.94 \times 10^{10}$ | $7.66 \times 10^9$    |
| 106 | 5.04  | -0.122 | 0.122 |  | $2.94 \times 10^{11}$ | $2.60 \times 10^9$    |
| 107 | 2.32  | -0.090 | 0.090 |  | $4.20 \times 10^{10}$ | $1.27 \times 10^9$    |
| 108 | 28.45 | -0.021 | 0.021 |  | $2.12 \times 10^{12}$ | $9.46 \times 10^{11}$ |
| 109 | 12.64 | -0.011 | 0.011 |  | $3.50 \times 10^{11}$ | $2.28 \times 10^{11}$ |

|      |                  |                    |                   |       |                                |                                |
|------|------------------|--------------------|-------------------|-------|--------------------------------|--------------------------------|
| 110  | 20.74            | -0.022             | 0.022             |       | $1.16 \times 10^{12}$          | $4.86 \times 10^{11}$          |
| 111  | 6.00             | -0.128             | 0.128             |       | $4.50 \times 10^{11}$          | $3.05 \times 10^9$             |
| 112  | 22.94            | -0.116             | 0.116             |       | $5.71 \times 10^{12}$          | $6.26 \times 10^{10}$          |
| 113  | 7.19             | -0.064             | 0.064             |       | $2.78 \times 10^{11}$          | $2.32 \times 10^{10}$          |
| 114  | 47.36            | -0.050             | 0.050             |       | $9.73 \times 10^{12}$          | $1.38 \times 10^{12}$          |
| 115  | 4.94             | -0.018             | 0.018             |       | $6.03 \times 10^{10}$          | $3.03 \times 10^{10}$          |
| 116  | 18.47            | -0.079             | 0.079             |       | $2.30 \times 10^{12}$          | $1.05 \times 10^{11}$          |
| 117  | 3.10             | -0.052             | 0.052             |       | $4.30 \times 10^{10}$          | $5.62 \times 10^9$             |
| 118  | 6.23             | -0.133             | 0.133             |       | $5.10 \times 10^{11}$          | $2.87 \times 10^9$             |
| 119  | 4.15             | -0.008             | 0.008             |       | $3.57 \times 10^{10}$          | $2.61 \times 10^{10}$          |
| 120  | 42.84            | -0.175             | 0.175             |       | $3.55 \times 10^{13}$          | $3.96 \times 10^{10}$          |
| 121  | 5.93             | -0.047             | 0.047             |       | $1.44 \times 10^{11}$          | $2.35 \times 10^{10}$          |
| 122  | 12.25            | -0.061             | 0.061             |       | $7.70 \times 10^{11}$          | $7.20 \times 10^{10}$          |
| 123  | 11.04            | -0.015             | 0.015             |       | $2.84 \times 10^{11}$          | $1.62 \times 10^{11}$          |
| 124  | 45.06            | -0.020             | 0.020             |       | $5.29 \times 10^{12}$          | $2.39 \times 10^{12}$          |
| 125  | 7.47             | -0.066             | 0.066             |       | $3.11 \times 10^{11}$          | $2.37 \times 10^{10}$          |
| 126  | 19.40            | -0.025             | 0.025             |       | $1.06 \times 10^{12}$          | $4.02 \times 10^{11}$          |
| 127  | 19.12            | -0.019             | 0.019             |       | $9.29 \times 10^{11}$          | $4.42 \times 10^{11}$          |
| 128  | 3.89             | -0.159             | 0.159             |       | $2.56 \times 10^{11}$          | $5.26 \times 10^8$             |
| 129  | 29.47            | -0.033             | 0.033             |       | $2.84 \times 10^{12}$          | $7.77 \times 10^{11}$          |
| 130  | 18.06            | -0.001             | 0.001             |       | $5.85 \times 10^{11}$          | $5.72 \times 10^{11}$          |
| 131  | 2.21             | -0.164             | 0.164             |       | $8.65 \times 10^{10}$          | $1.48 \times 10^8$             |
| 132  | 6.32             | -0.035             | 0.035             |       | $1.35 \times 10^{11}$          | $3.44 \times 10^{10}$          |
| 133  | 26.49            | -0.033             | 0.033             |       | $2.26 \times 10^{12}$          | $6.38 \times 10^{11}$          |
| 134  | 17.59            | -0.075             | 0.075             |       | $1.96 \times 10^{12}$          | $1.06 \times 10^{11}$          |
| 135  | 15.56            | -0.048             | 0.048             |       | $1.01 \times 10^{12}$          | $1.58 \times 10^{11}$          |
| 136  | 8.83             | -0.013             | 0.013             |       | $1.78 \times 10^{11}$          | $1.06 \times 10^{11}$          |
| 137  | 8.99             | -0.136             | 0.136             |       | $1.09 \times 10^{12}$          | $5.55 \times 10^9$             |
| 138  | 10.36            | -0.104             | 0.104             |       | $1.01 \times 10^{12}$          | $1.75 \times 10^{10}$          |
| 139  | 2.27             | -0.096             | 0.096             |       | $4.35 \times 10^{10}$          | $1.05 \times 10^9$             |
| 140  | 27.73            | -0.090             | 0.090             |       | $6.00 \times 10^{12}$          | $1.81 \times 10^{11}$          |
| 141  | 13.58            | -0.065             | 0.065             |       | $1.00 \times 10^{12}$          | $8.09 \times 10^{10}$          |
| 142  | 14.57            | -0.079             | 0.079             |       | $1.43 \times 10^{12}$          | $6.56 \times 10^{10}$          |
| 143  | 22.42            | 0.000              | 0.000             |       | $8.93 \times 10^{11}$          | $8.91 \times 10^{11}$          |
| Avg. | $11.46 \pm 9.81$ | $-0.066 \pm 0.053$ | $0.066 \pm 0.053$ | 0.294 | $1.43 \pm 3.57 \times 10^{12}$ | $1.62 \pm 3.23 \times 10^{11}$ |

| PB2:BTP-Bme blend |                  |                   |             |                     |                          |             |
|-------------------|------------------|-------------------|-------------|---------------------|--------------------------|-------------|
| pairs             | $ V_e $<br>(meV) | $\Delta E_e$ (eV) |             | $\lambda_e$<br>(eV) | $k_e$ (s <sup>-1</sup> ) |             |
|                   |                  | small→large       | large→small |                     | small→large              | large→small |

|    |       |        |       |       |                       |                       |
|----|-------|--------|-------|-------|-----------------------|-----------------------|
| 1  | 2.94  | -0.014 | 0.014 | 0.289 | $2.11 \times 10^{10}$ | $1.23 \times 10^{10}$ |
| 2  | 3.90  | -0.022 | 0.022 |       | $4.36 \times 10^{10}$ | $1.82 \times 10^{10}$ |
| 3  | 8.05  | -0.123 | 0.123 |       | $8.05 \times 10^{11}$ | $6.62 \times 10^9$    |
| 4  | 2.10  | -0.120 | 0.120 |       | $5.29 \times 10^{10}$ | $4.92 \times 10^8$    |
| 5  | 8.22  | -0.129 | 0.129 |       | $8.94 \times 10^{11}$ | $5.85 \times 10^9$    |
| 6  | 47.59 | -0.080 | 0.080 |       | $1.63 \times 10^{13}$ | $7.22 \times 10^{11}$ |
| 7  | 13.65 | -0.003 | 0.003 |       | $3.70 \times 10^{11}$ | $3.32 \times 10^{11}$ |
| 8  | 3.01  | -0.104 | 0.104 |       | $8.94 \times 10^{10}$ | $1.58 \times 10^9$    |
| 9  | 2.15  | -0.073 | 0.073 |       | $3.01 \times 10^{10}$ | $1.74 \times 10^9$    |
| 10 | 8.71  | -0.131 | 0.131 |       | $1.03 \times 10^{12}$ | $6.24 \times 10^9$    |
| 11 | 6.44  | -0.106 | 0.106 |       | $4.22 \times 10^{11}$ | $6.76 \times 10^9$    |
| 12 | 10.59 | -0.003 | 0.003 |       | $2.25 \times 10^{11}$ | $1.98 \times 10^{11}$ |
| 13 | 15.21 | -0.089 | 0.089 |       | $1.89 \times 10^{12}$ | $5.83 \times 10^{10}$ |
| 14 | 6.88  | -0.124 | 0.124 |       | $5.92 \times 10^{11}$ | $4.74 \times 10^9$    |
| 15 | 4.65  | -0.048 | 0.048 |       | $9.53 \times 10^{10}$ | $1.49 \times 10^{10}$ |
| 16 | 1.26  | -0.006 | 0.006 |       | $3.32 \times 10^9$    | $2.68 \times 10^9$    |
| 17 | 3.71  | -0.051 | 0.051 |       | $6.41 \times 10^{10}$ | $8.71 \times 10^9$    |
| 18 | 0.52  | -0.091 | 0.091 |       | $2.24 \times 10^9$    | $6.38 \times 10^7$    |
| 19 | 2.75  | -0.035 | 0.035 |       | $2.71 \times 10^{10}$ | $6.85 \times 10^9$    |
| 20 | 4.60  | -0.022 | 0.022 |       | $5.96 \times 10^{10}$ | $2.57 \times 10^{10}$ |
| 21 | 2.13  | -0.035 | 0.035 |       | $1.62 \times 10^{10}$ | $4.16 \times 10^9$    |
| 22 | 0.95  | -0.046 | 0.046 |       | $3.84 \times 10^9$    | $6.45 \times 10^8$    |
| 23 | 18.51 | -0.087 | 0.087 |       | $2.70 \times 10^{12}$ | $9.28 \times 10^{10}$ |
| 24 | 15.70 | -0.064 | 0.064 |       | $1.40 \times 10^{12}$ | $1.17 \times 10^{11}$ |
| 25 | 24.64 | -0.045 | 0.045 |       | $2.57 \times 10^{12}$ | $4.43 \times 10^{11}$ |
| 26 | 2.51  | -0.027 | 0.027 |       | $1.95 \times 10^{10}$ | $6.89 \times 10^9$    |
| 27 | 2.80  | -0.115 | 0.115 |       | $8.82 \times 10^{10}$ | $1.01 \times 10^9$    |
| 28 | 7.11  | -0.052 | 0.052 |       | $2.38 \times 10^{11}$ | $3.17 \times 10^{10}$ |
| 29 | 0.13  | -0.064 | 0.064 |       | $1.02 \times 10^8$    | $8.38 \times 10^6$    |
| 30 | 8.20  | -0.036 | 0.036 |       | $2.45 \times 10^{11}$ | $5.99 \times 10^{10}$ |
| 31 | 3.04  | -0.002 | 0.002 |       | $1.79 \times 10^{10}$ | $1.69 \times 10^{10}$ |
| 32 | 19.86 | -0.017 | 0.017 |       | $1.02 \times 10^{12}$ | $5.29 \times 10^{11}$ |
| 33 | 12.31 | -0.042 | 0.042 |       | $6.09 \times 10^{11}$ | $1.18 \times 10^{11}$ |
| 34 | 2.51  | 0.000  | 0.000 |       | $1.19 \times 10^{10}$ | $1.18 \times 10^{10}$ |
| 35 | 4.00  | -0.106 | 0.106 |       | $1.62 \times 10^{11}$ | $2.65 \times 10^9$    |
| 36 | 32.53 | -0.075 | 0.075 |       | $7.14 \times 10^{12}$ | $3.78 \times 10^{11}$ |
| 37 | 11.02 | -0.079 | 0.079 |       | $8.64 \times 10^{11}$ | $3.96 \times 10^{10}$ |
| 38 | 22.55 | -0.029 | 0.029 |       | $1.62 \times 10^{12}$ | $5.34 \times 10^{11}$ |
| 39 | 25.04 | -0.150 | 0.150 |       | $1.03 \times 10^{13}$ | $2.94 \times 10^{10}$ |

|    |       |        |       |  |                       |                       |
|----|-------|--------|-------|--|-----------------------|-----------------------|
| 40 | 9.08  | -0.155 | 0.155 |  | $1.41 \times 10^{12}$ | $3.41 \times 10^9$    |
| 41 | 3.99  | -0.107 | 0.107 |  | $1.63 \times 10^{11}$ | $2.56 \times 10^9$    |
| 42 | 29.01 | -0.136 | 0.136 |  | $1.20 \times 10^{13}$ | $6.03 \times 10^{10}$ |
| 43 | 4.40  | -0.131 | 0.131 |  | $2.63 \times 10^{11}$ | $1.58 \times 10^9$    |
| 44 | 28.61 | -0.033 | 0.033 |  | $2.83 \times 10^{12}$ | $7.76 \times 10^{11}$ |
| 45 | 18.38 | -0.050 | 0.050 |  | $1.54 \times 10^{12}$ | $2.21 \times 10^{11}$ |
| 46 | 0.06  | -0.036 | 0.036 |  | $1.24 \times 10^7$    | $3.02 \times 10^6$    |
| 47 | 1.09  | -0.054 | 0.054 |  | $5.81 \times 10^9$    | $7.14 \times 10^8$    |
| 48 | 2.77  | -0.063 | 0.063 |  | $4.30 \times 10^{10}$ | $3.71 \times 10^9$    |
| 49 | 2.39  | -0.052 | 0.052 |  | $2.72 \times 10^{10}$ | $3.53 \times 10^9$    |
| 50 | 9.34  | -0.041 | 0.041 |  | $3.45 \times 10^{11}$ | $6.94 \times 10^{10}$ |
| 51 | 6.82  | -0.136 | 0.136 |  | $6.59 \times 10^{11}$ | $3.36 \times 10^9$    |
| 52 | 31.04 | -0.055 | 0.055 |  | $4.75 \times 10^{12}$ | $5.66 \times 10^{11}$ |
| 53 | 10.78 | -0.154 | 0.154 |  | $1.97 \times 10^{12}$ | $4.89 \times 10^9$    |
| 54 | 44.96 | -0.011 | 0.011 |  | $4.72 \times 10^{12}$ | $3.04 \times 10^{12}$ |
| 55 | 11.09 | -0.041 | 0.041 |  | $4.87 \times 10^{11}$ | $9.80 \times 10^{10}$ |
| 56 | 17.13 | -0.014 | 0.014 |  | $7.19 \times 10^{11}$ | $4.19 \times 10^{11}$ |
| 57 | 0.65  | -0.122 | 0.122 |  | $5.26 \times 10^9$    | $4.52 \times 10^7$    |
| 58 | 11.12 | -0.185 | 0.185 |  | $2.68 \times 10^{12}$ | $2.03 \times 10^9$    |
| 59 | 15.10 | -0.178 | 0.178 |  | $4.71 \times 10^{12}$ | $4.62 \times 10^9$    |
| 60 | 6.14  | -0.001 | 0.001 |  | $7.22 \times 10^{10}$ | $6.98 \times 10^{10}$ |
| 61 | 11.36 | -0.102 | 0.102 |  | $1.25 \times 10^{12}$ | $2.32 \times 10^{10}$ |
| 62 | 8.35  | -0.089 | 0.089 |  | $5.70 \times 10^{11}$ | $1.76 \times 10^{10}$ |
| 63 | 16.04 | -0.069 | 0.069 |  | $1.58 \times 10^{12}$ | $1.08 \times 10^{11}$ |
| 64 | 6.76  | -0.056 | 0.056 |  | $2.31 \times 10^{11}$ | $2.60 \times 10^{10}$ |
| 65 | 14.16 | -0.013 | 0.013 |  | $4.86 \times 10^{11}$ | $2.89 \times 10^{11}$ |
| 66 | 39.78 | -0.074 | 0.074 |  | $1.05 \times 10^{13}$ | $5.84 \times 10^{11}$ |
| 67 | 5.03  | -0.009 | 0.009 |  | $5.61 \times 10^{10}$ | $4.01 \times 10^{10}$ |
| 68 | 7.65  | -0.094 | 0.094 |  | $5.11 \times 10^{11}$ | $1.30 \times 10^{10}$ |
| 69 | 2.71  | -0.092 | 0.092 |  | $6.20 \times 10^{10}$ | $1.74 \times 10^9$    |
| 70 | 2.26  | -0.060 | 0.060 |  | $2.74 \times 10^{10}$ | $2.64 \times 10^9$    |
| 71 | 12.81 | -0.025 | 0.025 |  | $4.89 \times 10^{11}$ | $1.87 \times 10^{11}$ |
| 72 | 12.34 | -0.098 | 0.098 |  | $1.40 \times 10^{12}$ | $3.07 \times 10^{10}$ |
| 73 | 16.56 | -0.046 | 0.046 |  | $1.18 \times 10^{12}$ | $1.96 \times 10^{11}$ |
| 74 | 2.31  | -0.007 | 0.007 |  | $1.15 \times 10^{10}$ | $8.73 \times 10^9$    |
| 75 | 19.80 | -0.025 | 0.025 |  | $1.18 \times 10^{12}$ | $4.40 \times 10^{11}$ |
| 76 | 5.87  | -0.042 | 0.042 |  | $1.38 \times 10^{11}$ | $2.70 \times 10^{10}$ |
| 77 | 6.45  | -0.131 | 0.131 |  | $5.64 \times 10^{11}$ | $3.41 \times 10^9$    |
| 78 | 25.17 | -0.005 | 0.005 |  | $1.31 \times 10^{12}$ | $1.08 \times 10^{12}$ |

|      |                  |                    |                   |                       |                                |                                |
|------|------------------|--------------------|-------------------|-----------------------|--------------------------------|--------------------------------|
| 79   | 7.41             | -0.117             | 0.117             |                       | $6.34 \times 10^{11}$          | $6.72 \times 10^9$             |
| 80   | 15.21            | -0.007             | 0.007             |                       | $5.00 \times 10^{11}$          | $3.78 \times 10^{11}$          |
| 81   | 11.05            | -0.085             | 0.085             |                       | $9.44 \times 10^{11}$          | $3.43 \times 10^{10}$          |
| 82   | 9.72             | -0.087             | 0.087             |                       | $7.47 \times 10^{11}$          | $2.55 \times 10^{10}$          |
| 83   | 2.50             | -0.034             | 0.034             |                       | $2.18 \times 10^{10}$          | $5.89 \times 10^9$             |
| 84   | 10.32            | -0.192             | 0.192             |                       | $2.42 \times 10^{12}$          | $1.39 \times 10^9$             |
| 85   | 1.44             | -0.058             | 0.058             |                       | $1.08 \times 10^{10}$          | $1.13 \times 10^9$             |
| 86   | 30.41            | -0.036             | 0.036             |                       | $3.35 \times 10^{12}$          | $8.28 \times 10^{11}$          |
| 87   | 2.01             | -0.035             | 0.035             |                       | $1.44 \times 10^{10}$          | $3.71 \times 10^9$             |
| 88   | 3.49             | -0.064             | 0.064             |                       | $6.96 \times 10^{10}$          | $5.69 \times 10^9$             |
| 89   | 2.67             | -0.074             | 0.074             |                       | $4.71 \times 10^{10}$          | $2.66 \times 10^9$             |
| 90   | 5.73             | -0.063             | 0.063             |                       | $1.85 \times 10^{11}$          | $1.58 \times 10^{10}$          |
| 91   | 23.85            | -0.105             | 0.105             |                       | $5.72 \times 10^{12}$          | $9.47 \times 10^{10}$          |
| 92   | 1.10             | -0.071             | 0.071             |                       | $7.72 \times 10^9$             | $4.83 \times 10^8$             |
| 93   | 0.84             | -0.012             | 0.012             |                       | $1.69 \times 10^9$             | $1.04 \times 10^9$             |
| 94   | 2.22             | -0.064             | 0.064             |                       | $2.79 \times 10^{10}$          | $2.33 \times 10^9$             |
| 95   | 6.71             | -0.091             | 0.091             |                       | $3.79 \times 10^{11}$          | $1.08 \times 10^{10}$          |
| 96   | 7.31             | -0.059             | 0.059             |                       | $2.81 \times 10^{11}$          | $2.85 \times 10^{10}$          |
| 97   | 1.89             | -0.150             | 0.150             |                       | $5.83 \times 10^{10}$          | $1.69 \times 10^8$             |
| 98   | 15.99            | -0.071             | 0.071             |                       | $1.61 \times 10^{12}$          | $1.03 \times 10^{11}$          |
| 99   | 7.79             | -0.013             | 0.013             |                       | $1.47 \times 10^{11}$          | $8.72 \times 10^{10}$          |
| 100  | 7.56             | -0.052             | 0.052             | $2.68 \times 10^{11}$ | $3.60 \times 10^{10}$          |                                |
| 101  | 10.75            | -0.046             | 0.046             | $4.92 \times 10^{11}$ | $8.34 \times 10^{10}$          |                                |
| Avg. | $10.30 \pm 9.82$ | $-0.068 \pm 0.046$ | $0.068 \pm 0.046$ | 0.289                 | $1.30 \pm 2.62 \times 10^{12}$ | $1.39 \pm 3.56 \times 10^{11}$ |

| PB2:BTP-Biso blend |                  |                   |             |                     |                          |                       |
|--------------------|------------------|-------------------|-------------|---------------------|--------------------------|-----------------------|
| pairs              | $ V_e $<br>(meV) | $\Delta E_e$ (eV) |             | $\lambda_e$<br>(eV) | $k_e$ (s <sup>-1</sup> ) |                       |
|                    |                  | small→large       | large→small |                     | small→large              | large→small           |
| 1                  | 5.30             | -0.050            | 0.050       | 0.286               | $1.33 \times 10^{11}$    | $1.89 \times 10^{10}$ |
| 2                  | 2.03             | -0.050            | 0.050       |                     | $4.84 \times 10^{10}$    | $2.78 \times 10^9$    |
| 3                  | 4.81             | -0.116            | 0.116       |                     | $5.02 \times 10^{10}$    | $2.98 \times 10^9$    |
| 4                  | 2.49             | -0.006            | 0.006       |                     | $1.34 \times 10^{10}$    | $1.09 \times 10^{10}$ |
| 5                  | 1.79             | -0.005            | 0.005       |                     | $5.59 \times 10^{10}$    | $5.65 \times 10^9$    |
| 6                  | 18.12            | -0.154            | 0.154       |                     | $2.86 \times 10^{12}$    | $1.42 \times 10^{10}$ |
| 7                  | 7.35             | -0.092            | 0.092       |                     | $1.80 \times 10^{11}$    | $1.32 \times 10^{10}$ |
| 8                  | 31.43            | -0.029            | 0.029       |                     | $3.10 \times 10^{12}$    | $1.06 \times 10^{12}$ |
| 9                  | 0.10             | -0.026            | 0.026       |                     | $3.75 \times 10^7$       | $1.20 \times 10^7$    |
| 10                 | 28.29            | -0.034            | 0.034       |                     | $3.12 \times 10^{12}$    | $7.81 \times 10^{11}$ |
| 11                 | 0.56             | -0.038            | 0.038       |                     | $2.77 \times 10^9$       | $2.75 \times 10^8$    |

|    |       |        |       |  |                       |                       |
|----|-------|--------|-------|--|-----------------------|-----------------------|
| 12 | 1.99  | -0.093 | 0.093 |  | $7.87 \times 10^9$    | $9.38 \times 10^8$    |
| 13 | 2.70  | -0.001 | 0.001 |  | $4.24 \times 10^{10}$ | $1.39 \times 10^{10}$ |
| 14 | 17.21 | -0.063 | 0.063 |  | $1.39 \times 10^{12}$ | $1.48 \times 10^{11}$ |
| 15 | 10.63 | -0.049 | 0.049 |  | $5.85 \times 10^{11}$ | $7.74 \times 10^{10}$ |
| 16 | 17.14 | -0.056 | 0.056 |  | $3.10 \times 10^{12}$ | $1.75 \times 10^{11}$ |
| 17 | 9.63  | -0.107 | 0.107 |  | $1.44 \times 10^{12}$ | $1.54 \times 10^{10}$ |
| 18 | 2.29  | -0.142 | 0.142 |  | $3.91 \times 10^{10}$ | $3.24 \times 10^8$    |
| 19 | 21.32 | -0.080 | 0.080 |  | $2.14 \times 10^{12}$ | $1.50 \times 10^{11}$ |
| 20 | 15.69 | -0.050 | 0.050 |  | $2.02 \times 10^{12}$ | $1.68 \times 10^{11}$ |
| 21 | 4.27  | -0.087 | 0.087 |  | $1.13 \times 10^{11}$ | $5.01 \times 10^9$    |
| 22 | 5.74  | -0.067 | 0.067 |  | $2.28 \times 10^{11}$ | $1.48 \times 10^{10}$ |
| 23 | 30.62 | -0.075 | 0.075 |  | $6.89 \times 10^{12}$ | $3.50 \times 10^{11}$ |
| 24 | 0.22  | -0.079 | 0.079 |  | $1.05 \times 10^8$    | $1.66 \times 10^7$    |
| 25 | 8.05  | -0.005 | 0.005 |  | $1.67 \times 10^{12}$ | $1.15 \times 10^{11}$ |
| 26 | 2.52  | -0.210 | 0.210 |  | $2.56 \times 10^{10}$ | $4.69 \times 10^7$    |
| 27 | 2.01  | -0.040 | 0.040 |  | $9.68 \times 10^9$    | $3.42 \times 10^9$    |
| 28 | 6.61  | -0.011 | 0.011 |  | $7.55 \times 10^{11}$ | $6.89 \times 10^{10}$ |
| 29 | 0.11  | -0.153 | 0.153 |  | $3.20 \times 10^7$    | $5.67 \times 10^5$    |
| 30 | 5.03  | -0.013 | 0.013 |  | $9.46 \times 10^{10}$ | $3.78 \times 10^{10}$ |
| 31 | 6.80  | -0.036 | 0.036 |  | $6.02 \times 10^{11}$ | $4.31 \times 10^{10}$ |
| 32 | 18.99 | -0.125 | 0.125 |  | $1.14 \times 10^{12}$ | $3.62 \times 10^{10}$ |
| 33 | 14.82 | -0.026 | 0.026 |  | $5.20 \times 10^{11}$ | $2.52 \times 10^{11}$ |
| 34 | 5.45  | -0.010 | 0.010 |  | $5.86 \times 10^{10}$ | $4.73 \times 10^{10}$ |
| 35 | 2.42  | -0.001 | 0.001 |  | $8.84 \times 10^{10}$ | $1.13 \times 10^{10}$ |
| 36 | 1.56  | -0.139 | 0.139 |  | $1.07 \times 10^{10}$ | $1.64 \times 10^8$    |
| 37 | 30.21 | -0.046 | 0.046 |  | $2.95 \times 10^{12}$ | $6.83 \times 10^{11}$ |
| 38 | 37.75 | -0.027 | 0.027 |  | $7.37 \times 10^{12}$ | $1.59 \times 10^{12}$ |
| 39 | 1.31  | -0.056 | 0.056 |  | $1.46 \times 10^{10}$ | $1.03 \times 10^9$    |
| 40 | 4.95  | -0.089 | 0.089 |  | $2.13 \times 10^{11}$ | $6.38 \times 10^9$    |
| 41 | 27.86 | -0.091 | 0.091 |  | $9.97 \times 10^{12}$ | $1.92 \times 10^{11}$ |
| 42 | 1.64  | -0.124 | 0.124 |  | $2.43 \times 10^{10}$ | $2.81 \times 10^8$    |
| 43 | 20.53 | -0.094 | 0.094 |  | $3.92 \times 10^{12}$ | $9.68 \times 10^{10}$ |
| 44 | 0.01  | -0.097 | 0.097 |  | $1.48 \times 10^6$    | $4.48 \times 10^4$    |
| 45 | 3.52  | -0.077 | 0.077 |  | $4.90 \times 10^{10}$ | $4.38 \times 10^9$    |
| 46 | 4.88  | -0.039 | 0.039 |  | $1.83 \times 10^{11}$ | $2.06 \times 10^{10}$ |
| 47 | 2.37  | -0.082 | 0.082 |  | $6.96 \times 10^{10}$ | $1.76 \times 10^9$    |
| 48 | 20.73 | -0.120 | 0.120 |  | $1.09 \times 10^{12}$ | $4.92 \times 10^{10}$ |
| 49 | 9.44  | -0.014 | 0.014 |  | $2.23 \times 10^{11}$ | $1.31 \times 10^{11}$ |
| 50 | 1.80  | -0.013 | 0.013 |  | $9.43 \times 10^9$    | $4.83 \times 10^9$    |

|      |               |                  |                 |       |                                |                                |
|------|---------------|------------------|-----------------|-------|--------------------------------|--------------------------------|
| 51   | 5.60          | -0.022           | 0.022           |       | $2.20 \times 10^{11}$          | $3.94 \times 10^{10}$          |
| 52   | 5.74          | -0.076           | 0.076           |       | $4.16 \times 10^{11}$          | $1.20 \times 10^{10}$          |
| 53   | 7.95          | -0.122           | 0.122           |       | $1.23 \times 10^{11}$          | $6.86 \times 10^9$             |
| Avg. | 9.48±<br>9.75 | -0.066±<br>0.047 | 0.066±<br>0.047 | 0.286 | 1.12±<br>$2.02 \times 10^{12}$ | 1.22±<br>$2.86 \times 10^{11}$ |

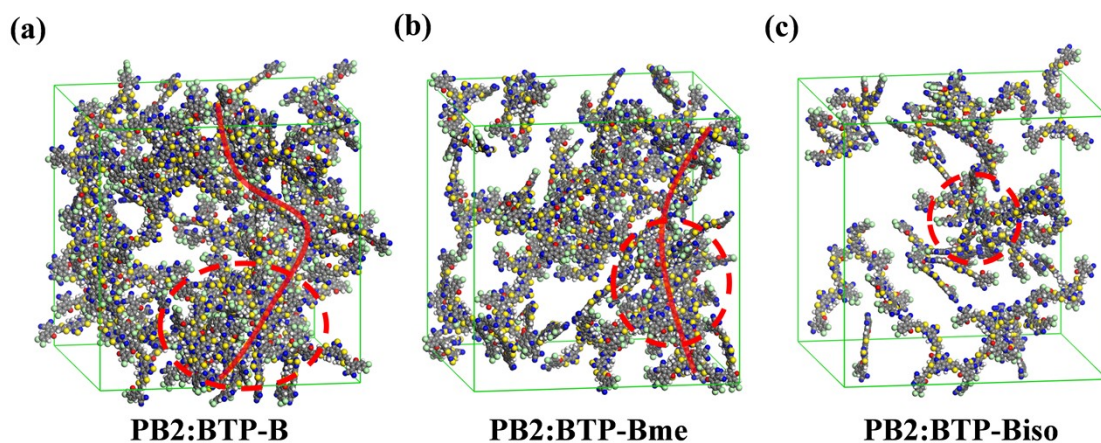

**Figure S4.** (a-c) Illustration of the intermolecular connected clusters found in the MD-simulated PB2:BTP-B, PB2:BTP-Bme, and PB2:BTP-Biso blends, when the intermolecular electron-transfer rates larger than  $10^{11} \text{ s}^{-1}$  are taken into account. The red curves represent the electron transport pathways and red circles denote the largest clusters found in the blends.

**Table S6.** Interchain hole transfer rates,  $k_h$ , for the 48, 52, and 57 PB2\_PB2  $\pi$ - $\pi$  packing pairs extracted, respectively, from the MD-simulated PB2:BTP-B, PB2:BTP-Bme, and PB2:BTP-Biso blends. Here, “small→large” means hole transfer from a PB2 chain with a smaller IP to one with a larger IP, and “large→small” means the reverse process.

| PB2:BTP-B blend |                  |                   |             |                     |                          |                       |
|-----------------|------------------|-------------------|-------------|---------------------|--------------------------|-----------------------|
| pairs           | $ V_h $<br>(meV) | $\Delta E_h$ (eV) |             | $\lambda_h$<br>(eV) | $k_h$ (s <sup>-1</sup> ) |                       |
|                 |                  | small→large       | large→small |                     | small→large              | large→small           |
| 1               | 3.70             | -0.028            | 0.028       | 0.368               | $1.77 \times 10^{10}$    | $6.01 \times 10^9$    |
| 2               | 32.99            | -0.045            | 0.045       |                     | $1.89 \times 10^{12}$    | $3.33 \times 10^{11}$ |
| 3               | 9.54             | -0.062            | 0.062       |                     | $2.12 \times 10^{11}$    | $1.89 \times 10^{10}$ |
| 4               | 10.87            | -0.087            | 0.087       |                     | $4.03 \times 10^{11}$    | $1.37 \times 10^{10}$ |
| 5               | 3.66             | -0.020            | 0.020       |                     | $1.51 \times 10^{10}$    | $6.89 \times 10^9$    |
| 6               | 3.22             | -0.083            | 0.083       |                     | $3.34 \times 10^{10}$    | $1.32 \times 10^9$    |
| 7               | 14.27            | -0.184            | 0.184       |                     | $2.29 \times 10^{12}$    | $1.79 \times 10^9$    |
| 8               | 15.54            | -0.048            | 0.048       |                     | $4.47 \times 10^{11}$    | $6.79 \times 10^{10}$ |
| 9               | 10.57            | -0.037            | 0.037       |                     | $1.70 \times 10^{11}$    | $4.05 \times 10^{10}$ |
| 10              | 14.74            | -0.006            | 0.006       |                     | $1.87 \times 10^{11}$    | $1.49 \times 10^{11}$ |
| 11              | 7.91             | -0.033            | 0.033       |                     | $8.82 \times 10^{10}$    | $2.47 \times 10^{10}$ |
| 12              | 5.75             | -0.162            | 0.162       |                     | $2.96 \times 10^{11}$    | $5.48 \times 10^8$    |
| 13              | 0.20             | -0.130            | 0.130       |                     | $2.46 \times 10^8$       | $1.57 \times 10^6$    |
| 14              | 32.28            | -0.016            | 0.016       |                     | $1.08 \times 10^{12}$    | $5.83 \times 10^{11}$ |
| 15              | 3.68             | -0.051            | 0.051       |                     | $2.64 \times 10^{10}$    | $3.58 \times 10^9$    |
| 16              | 1.40             | -0.061            | 0.061       |                     | $4.45 \times 10^9$       | $4.18 \times 10^8$    |
| 17              | 3.36             | -0.071            | 0.071       |                     | $3.04 \times 10^{10}$    | $1.90 \times 10^9$    |
| 18              | 1.52             | -0.118            | 0.118       |                     | $1.23 \times 10^{10}$    | $1.23 \times 10^8$    |
| 19              | 29.55            | -0.112            | 0.112       |                     | $4.28 \times 10^{12}$    | $5.40 \times 10^{10}$ |
| 20              | 10.78            | -0.030            | 0.030       |                     | $1.57 \times 10^{11}$    | $4.81 \times 10^{10}$ |
| 21              | 27.39            | -0.123            | 0.123       |                     | $4.24 \times 10^{12}$    | $3.52 \times 10^{10}$ |
| 22              | 3.47             | -0.136            | 0.136       |                     | $8.04 \times 10^{10}$    | $3.96 \times 10^8$    |
| 23              | 5.89             | -0.057            | 0.057       |                     | $7.43 \times 10^{10}$    | $8.05 \times 10^9$    |
| 24              | 41.47            | -0.012            | 0.012       |                     | $1.65 \times 10^{12}$    | $1.05 \times 10^{12}$ |
| 25              | 3.90             | -0.006            | 0.006       |                     | $1.31 \times 10^{10}$    | $1.04 \times 10^{10}$ |
| 26              | 0.32             | -0.227            | 0.227       |                     | $1.64 \times 10^9$       | $2.40 \times 10^5$    |
| 27              | 22.14            | -0.068            | 0.068       |                     | $1.25 \times 10^{12}$    | $8.91 \times 10^{10}$ |
| 28              | 16.29            | -0.153            | 0.153       |                     | $2.16 \times 10^{12}$    | $5.60 \times 10^9$    |
| 29              | 17.60            | -0.032            | 0.032       |                     | $4.33 \times 10^{11}$    | $1.24 \times 10^{11}$ |
| 30              | 1.18             | -0.080            | 0.080       |                     | $4.28 \times 10^9$       | $1.91 \times 10^8$    |
| 31              | 51.97            | -0.114            | 0.114       |                     | $1.35 \times 10^{13}$    | $1.60 \times 10^{11}$ |
| 32              | 24.16            | -0.093            | 0.093       |                     | $2.17 \times 10^{12}$    | $5.87 \times 10^{10}$ |

|      |                   |                    |                   |       |                                |                                |
|------|-------------------|--------------------|-------------------|-------|--------------------------------|--------------------------------|
| 33   | 2.13              | -0.011             | 0.011             | 0.368 | $4.29 \times 10^9$             | $2.80 \times 10^9$             |
| 34   | 4.02              | -0.045             | 0.045             |       | $2.83 \times 10^{10}$          | $4.91 \times 10^9$             |
| 35   | 15.18             | -0.187             | 0.187             |       | $2.67 \times 10^{12}$          | $1.86 \times 10^9$             |
| 36   | 4.49              | -0.032             | 0.032             |       | $2.81 \times 10^{10}$          | $8.09 \times 10^9$             |
| 37   | 9.63              | -0.043             | 0.043             |       | $1.57 \times 10^{11}$          | $2.94 \times 10^{10}$          |
| 38   | 0.97              | -0.055             | 0.055             |       | $1.96 \times 10^9$             | $2.31 \times 10^8$             |
| 39   | 20.77             | -0.139             | 0.139             |       | $2.98 \times 10^{12}$          | $1.33 \times 10^{10}$          |
| 40   | 0.55              | -0.052             | 0.052             |       | $5.95 \times 10^8$             | $7.95 \times 10^7$             |
| 41   | 4.41              | -0.007             | 0.007             |       | $1.71 \times 10^{10}$          | $1.30 \times 10^{10}$          |
| 42   | 7.05              | -0.243             | 0.243             |       | $9.11 \times 10^{11}$          | $6.96 \times 10^7$             |
| 43   | 11.76             | -0.014             | 0.014             |       | $1.39 \times 10^{11}$          | $8.01 \times 10^{10}$          |
| 44   | 27.46             | -0.117             | 0.117             |       | $3.95 \times 10^{12}$          | $4.10 \times 10^{10}$          |
| 45   | 8.37              | -0.017             | 0.017             |       | $7.48 \times 10^{10}$          | $3.82 \times 10^{10}$          |
| 46   | 28.88             | 0.000              | 0.000             |       | $6.46 \times 10^{11}$          | $6.36 \times 10^{11}$          |
| 47   | 12.54             | -0.026             | 0.026             |       | $1.97 \times 10^{11}$          | $7.14 \times 10^{10}$          |
| 48   | 7.26              | -0.028             | 0.028             |       | $6.82 \times 10^{10}$          | $2.30 \times 10^{10}$          |
| Avg. | $12.43 \pm 11.73$ | $-0.073 \pm 0.060$ | $0.073 \pm 0.060$ |       | $1.02 \pm 2.17 \times 10^{12}$ | $0.80 \pm 1.91 \times 10^{11}$ |

| PB2:BTP-Bme blend |                  |                   |             |                     |                          |                       |
|-------------------|------------------|-------------------|-------------|---------------------|--------------------------|-----------------------|
| pairs             | $ V_h $<br>(meV) | $\Delta E_h$ (eV) |             | $\lambda_h$<br>(eV) | $k_h$ (s <sup>-1</sup> ) |                       |
|                   |                  | small→large       | large→small |                     | small→large              | large→small           |
| 1                 | 9.10             | -0.087            | 0.087       | 0.368               | $2.82 \times 10^{11}$    | $9.63 \times 10^9$    |
| 2                 | 9.79             | -0.040            | 0.040       |                     | $1.53 \times 10^{11}$    | $3.26 \times 10^{10}$ |
| 3                 | 31.76            | -0.068            | 0.068       |                     | $2.58 \times 10^{12}$    | $1.82 \times 10^{11}$ |
| 4                 | 3.48             | -0.020            | 0.020       |                     | $1.35 \times 10^{10}$    | $6.28 \times 10^9$    |
| 5                 | 12.43            | -0.059            | 0.059       |                     | $3.43 \times 10^{11}$    | $3.40 \times 10^{10}$ |
| 6                 | 21.68            | -0.072            | 0.072       |                     | $1.28 \times 10^{12}$    | $7.73 \times 10^{10}$ |
| 7                 | 46.83            | -0.020            | 0.020       |                     | $2.48 \times 10^{12}$    | $1.12 \times 10^{12}$ |
| 8                 | 8.38             | -0.138            | 0.138       |                     | $4.78 \times 10^{11}$    | $2.23 \times 10^9$    |
| 9                 | 48.62            | -0.070            | 0.070       |                     | $6.22 \times 10^{12}$    | $4.10 \times 10^{11}$ |
| 10                | 4.35             | -0.029            | 0.029       |                     | $2.52 \times 10^{10}$    | $8.01 \times 10^9$    |
| 11                | 36.02            | -0.014            | 0.014       |                     | $1.30 \times 10^{12}$    | $7.57 \times 10^{11}$ |
| 12                | 5.51             | -0.145            | 0.145       |                     | $2.26 \times 10^{11}$    | $7.87 \times 10^8$    |
| 13                | 0.00             | -0.041            | 0.041       |                     | $1.30 \times 10^4$       | $2.63 \times 10^3$    |
| 14                | 1.82             | -0.038            | 0.038       |                     | $5.14 \times 10^9$       | $1.15 \times 10^9$    |
| 15                | 0.19             | -0.068            | 0.068       |                     | $9.67 \times 10^7$       | $6.86 \times 10^6$    |
| 16                | 7.67             | -0.014            | 0.014       |                     | $5.91 \times 10^{10}$    | $3.41 \times 10^{10}$ |
| 17                | 2.25             | -0.040            | 0.040       |                     | $8.17 \times 10^9$       | $1.71 \times 10^9$    |
| 18                | 32.17            | -0.011            | 0.011       |                     | $9.77 \times 10^{11}$    | $6.43 \times 10^{11}$ |

|      |                   |                    |                   |       |                                |                                |
|------|-------------------|--------------------|-------------------|-------|--------------------------------|--------------------------------|
| 19   | 30.16             | -0.050             | 0.050             |       | $1.73 \times 10^{12}$          | $2.48 \times 10^{11}$          |
| 20   | 17.20             | -0.214             | 0.214             |       | $4.35 \times 10^{12}$          | $1.06 \times 10^9$             |
| 21   | 12.10             | -0.153             | 0.153             |       | $1.18 \times 10^{12}$          | $3.12 \times 10^9$             |
| 22   | 0.02              | -0.144             | 0.144             |       | $2.01 \times 10^6$             | $7.40 \times 10^3$             |
| 23   | 11.02             | -0.123             | 0.123             |       | $6.83 \times 10^{11}$          | $5.76 \times 10^9$             |
| 24   | 6.36              | -0.063             | 0.063             |       | $9.61 \times 10^{10}$          | $8.11 \times 10^9$             |
| 25   | 0.01              | -0.024             | 0.024             |       | $5.83 \times 10^4$             | $2.25 \times 10^4$             |
| 26   | 33.36             | -0.045             | 0.045             |       | $1.95 \times 10^{12}$          | $3.38 \times 10^{11}$          |
| 27   | 9.46              | -0.332             | 0.332             |       | $2.39 \times 10^{12}$          | $5.89 \times 10^6$             |
| 28   | 27.16             | -0.143             | 0.143             |       | $5.33 \times 10^{12}$          | $2.05 \times 10^{10}$          |
| 29   | 23.52             | -0.065             | 0.065             |       | $1.35 \times 10^{12}$          | $1.07 \times 10^{11}$          |
| 30   | 19.15             | -0.006             | 0.006             |       | $3.18 \times 10^{11}$          | $2.49 \times 10^{11}$          |
| 31   | 12.86             | -0.043             | 0.043             |       | $2.80 \times 10^{11}$          | $5.22 \times 10^{10}$          |
| 32   | 27.93             | -0.207             | 0.207             |       | $1.09 \times 10^{13}$          | $3.40 \times 10^9$             |
| 33   | 2.38              | -0.062             | 0.062             |       | $1.31 \times 10^{10}$          | $1.18 \times 10^9$             |
| 34   | 27.46             | -0.106             | 0.106             |       | $3.38 \times 10^{12}$          | $5.48 \times 10^{10}$          |
| 35   | 15.98             | -0.029             | 0.029             |       | $3.40 \times 10^{11}$          | $1.08 \times 10^{11}$          |
| 36   | 3.72              | -0.090             | 0.090             |       | $4.95 \times 10^{10}$          | $1.49 \times 10^9$             |
| 37   | 9.84              | -0.069             | 0.069             |       | $2.53 \times 10^{11}$          | $1.69 \times 10^{10}$          |
| 38   | 5.24              | -0.082             | 0.082             |       | $8.67 \times 10^{10}$          | $3.61 \times 10^9$             |
| 39   | 25.86             | -0.042             | 0.042             |       | $1.11 \times 10^{12}$          | $2.16 \times 10^{11}$          |
| 40   | 1.88              | -0.007             | 0.007             |       | $3.08 \times 10^9$             | $2.37 \times 10^9$             |
| 41   | 22.74             | -0.135             | 0.135             |       | $3.41 \times 10^{12}$          | $1.75 \times 10^{10}$          |
| 42   | 18.50             | -0.015             | 0.015             |       | $3.50 \times 10^{11}$          | $1.96 \times 10^{11}$          |
| 43   | 6.19              | -0.129             | 0.129             |       | $2.32 \times 10^{11}$          | $1.55 \times 10^9$             |
| 44   | 5.60              | -0.120             | 0.120             |       | $1.71 \times 10^{11}$          | $1.58 \times 10^9$             |
| 45   | 32.34             | -0.014             | 0.014             |       | $1.04 \times 10^{12}$          | $6.13 \times 10^{11}$          |
| 46   | 27.34             | -0.079             | 0.079             |       | $2.25 \times 10^{12}$          | $1.06 \times 10^{11}$          |
| 47   | 18.96             | -0.054             | 0.054             |       | $7.34 \times 10^{11}$          | $8.90 \times 10^{10}$          |
| 48   | 5.67              | -0.101             | 0.101             |       | $1.34 \times 10^{11}$          | $2.65 \times 10^9$             |
| 49   | 30.87             | -0.068             | 0.068             |       | $2.43 \times 10^{12}$          | $1.73 \times 10^{11}$          |
| 50   | 21.47             | -0.178             | 0.178             |       | $4.89 \times 10^{12}$          | $4.81 \times 10^9$             |
| 51   | 3.62              | -0.043             | 0.043             |       | $2.22 \times 10^{10}$          | $4.15 \times 10^9$             |
| 52   | 2.74              | -0.045             | 0.045             |       | $1.30 \times 10^{10}$          | $2.28 \times 10^9$             |
| Avg. | $15.40 \pm 12.61$ | $-0.078 \pm 0.062$ | $0.078 \pm 0.062$ | 0.368 | $1.31 \pm 2.02 \times 10^{12}$ | $1.15 \pm 2.21 \times 10^{11}$ |

| PB2:BTP-Biso blend |         |                   |             |                          |
|--------------------|---------|-------------------|-------------|--------------------------|
| pairs              | $ V_h $ | $\Delta E_h$ (eV) | $\lambda_h$ | $k_h$ (s <sup>-1</sup> ) |

|    | (meV) | small→large | large→small | (eV)  | small→large           | large→small           |
|----|-------|-------------|-------------|-------|-----------------------|-----------------------|
| 1  | 0.13  | -0.086      | 0.086       | 0.368 | $5.44 \times 10^7$    | $1.88 \times 10^6$    |
| 2  | 27.80 | -0.050      | 0.050       |       | $1.47 \times 10^{12}$ | $2.11 \times 10^{11}$ |
| 3  | 22.02 | -0.071      | 0.071       |       | $1.30 \times 10^{12}$ | $8.21 \times 10^{10}$ |
| 4  | 18.23 | -0.078      | 0.078       |       | $9.94 \times 10^{11}$ | $4.75 \times 10^{10}$ |
| 5  | 14.56 | -0.040      | 0.040       |       | $3.43 \times 10^{11}$ | $7.09 \times 10^{10}$ |
| 6  | 28.57 | -0.036      | 0.036       |       | $1.22 \times 10^{12}$ | $3.02 \times 10^{11}$ |
| 7  | 15.42 | -0.099      | 0.099       |       | $9.66 \times 10^{11}$ | $2.06 \times 10^{10}$ |
| 8  | 1.34  | -0.059      | 0.059       |       | $3.96 \times 10^9$    | $3.97 \times 10^8$    |
| 9  | 26.91 | -0.009      | 0.009       |       | $6.58 \times 10^{11}$ | $4.69 \times 10^{11}$ |
| 10 | 43.24 | -0.025      | 0.025       |       | $2.30 \times 10^{12}$ | $8.70 \times 10^{11}$ |
| 11 | 22.69 | -0.044      | 0.044       |       | $8.78 \times 10^{11}$ | $1.61 \times 10^{11}$ |
| 12 | 16.49 | -0.024      | 0.024       |       | $3.30 \times 10^{11}$ | $1.28 \times 10^{11}$ |
| 13 | 9.02  | -0.006      | 0.006       |       | $6.99 \times 10^{10}$ | $5.58 \times 10^{10}$ |
| 14 | 1.10  | -0.028      | 0.028       |       | $1.56 \times 10^9$    | $5.21 \times 10^8$    |
| 15 | 16.10 | -0.137      | 0.137       |       | $1.75 \times 10^{12}$ | $8.42 \times 10^9$    |
| 16 | 4.88  | -0.073      | 0.073       |       | $6.62 \times 10^{10}$ | $3.79 \times 10^9$    |
| 17 | 20.44 | -0.002      | 0.002       |       | $3.36 \times 10^{11}$ | $3.06 \times 10^{11}$ |
| 18 | 11.03 | -0.045      | 0.045       |       | $2.13 \times 10^{11}$ | $3.69 \times 10^{10}$ |
| 19 | 7.00  | -0.057      | 0.057       |       | $1.04 \times 10^{11}$ | $1.15 \times 10^{10}$ |
| 20 | 14.57 | -0.121      | 0.121       |       | $1.17 \times 10^{12}$ | $1.05 \times 10^{10}$ |
| 21 | 6.98  | -0.012      | 0.012       |       | $4.74 \times 10^{10}$ | $2.93 \times 10^{10}$ |
| 22 | 0.40  | -0.082      | 0.082       |       | $5.16 \times 10^8$    | $2.13 \times 10^7$    |
| 23 | 21.71 | -0.113      | 0.113       |       | $2.32 \times 10^{12}$ | $2.90 \times 10^{10}$ |
| 24 | 5.04  | -0.056      | 0.056       |       | $5.36 \times 10^{10}$ | $6.02 \times 10^9$    |
| 25 | 5.17  | -0.013      | 0.013       |       | $2.62 \times 10^{10}$ | $1.59 \times 10^{10}$ |
| 26 | 10.92 | -0.004      | 0.004       |       | $9.88 \times 10^{10}$ | $8.49 \times 10^{10}$ |
| 27 | 49.90 | -0.014      | 0.014       |       | $2.50 \times 10^{12}$ | $1.45 \times 10^{12}$ |
| 28 | 2.67  | -0.033      | 0.033       |       | $1.02 \times 10^{10}$ | $2.79 \times 10^9$    |
| 29 | 9.78  | -0.037      | 0.037       |       | $1.44 \times 10^{11}$ | $3.48 \times 10^{10}$ |
| 30 | 1.14  | -0.058      | 0.058       |       | $2.82 \times 10^9$    | $3.00 \times 10^8$    |
| 31 | 4.11  | -0.027      | 0.027       |       | $2.16 \times 10^{10}$ | $7.51 \times 10^9$    |
| 32 | 26.83 | -0.037      | 0.037       |       | $1.09 \times 10^{12}$ | $2.61 \times 10^{11}$ |
| 33 | 57.80 | -0.043      | 0.043       |       | $5.65 \times 10^{12}$ | $1.06 \times 10^{12}$ |
| 34 | 0.28  | -0.134      | 0.134       |       | $4.92 \times 10^8$    | $2.68 \times 10^6$    |
| 35 | 14.85 | -0.194      | 0.194       |       | $2.74 \times 10^{12}$ | $1.42 \times 10^9$    |
| 36 | 0.93  | -0.103      | 0.103       |       | $3.76 \times 10^9$    | $6.75 \times 10^7$    |
| 37 | 0.24  | -0.198      | 0.198       |       | $7.46 \times 10^8$    | $3.39 \times 10^5$    |
| 38 | 3.09  | -0.185      | 0.185       |       | $1.09 \times 10^{11}$ | $8.05 \times 10^7$    |
| 39 | 17.80 | -0.112      | 0.112       |       | $1.54 \times 10^{12}$ | $1.99 \times 10^{10}$ |

|      |                 |                  |                 |       |                                |                                |
|------|-----------------|------------------|-----------------|-------|--------------------------------|--------------------------------|
| 40   | 51.13           | -0.008           | 0.008           |       | $2.36 \times 10^{12}$          | $1.70 \times 10^{12}$          |
| 41   | 10.05           | -0.027           | 0.027           |       | $1.30 \times 10^{11}$          | $4.45 \times 10^{10}$          |
| 42   | 24.53           | -0.039           | 0.039           |       | $9.51 \times 10^{11}$          | $2.07 \times 10^{11}$          |
| 43   | 8.25            | -0.027           | 0.027           |       | $8.71 \times 10^{10}$          | $3.01 \times 10^{10}$          |
| 44   | 5.61            | -0.093           | 0.093           |       | $1.17 \times 10^{11}$          | $3.18 \times 10^9$             |
| 45   | 2.43            | -0.115           | 0.115           |       | $3.00 \times 10^{10}$          | $3.44 \times 10^8$             |
| 46   | 19.28           | -0.046           | 0.046           |       | $6.63 \times 10^{11}$          | $1.10 \times 10^{11}$          |
| 47   | 22.45           | -0.078           | 0.078           |       | $1.51 \times 10^{12}$          | $7.17 \times 10^{10}$          |
| 48   | 0.41            | -0.042           | 0.042           |       | $2.75 \times 10^8$             | $5.33 \times 10^7$             |
| 49   | 32.73           | -0.166           | 0.166           |       | $1.01 \times 10^{13}$          | $1.55 \times 10^{10}$          |
| 50   | 27.11           | -0.088           | 0.088           |       | $2.57 \times 10^{12}$          | $8.21 \times 10^{10}$          |
| 51   | 18.49           | -0.050           | 0.050           |       | $6.55 \times 10^{11}$          | $9.20 \times 10^{10}$          |
| 52   | 8.42            | 0.000            | 0.000           |       | $5.49 \times 10^{10}$          | $5.40 \times 10^{10}$          |
| 53   | 12.44           | -0.203           | 0.203           |       | $2.09 \times 10^{12}$          | $7.65 \times 10^8$             |
| 54   | 1.26            | -0.068           | 0.068           |       | $4.07 \times 10^9$             | $2.89 \times 10^8$             |
| 55   | 49.07           | -0.273           | 0.273           |       | $5.23 \times 10^{13}$          | $1.28 \times 10^9$             |
| 56   | 0.06            | -0.044           | 0.044           |       | $5.61 \times 10^6$             | $1.02 \times 10^6$             |
| 57   | 46.30           | -0.023           | 0.023           |       | $2.54 \times 10^{12}$          | $1.04 \times 10^{12}$          |
| Avg. | 15.81±<br>14.69 | -0.069±<br>0.058 | 0.069±<br>0.058 | 0.368 | 1.87±<br>$6.94 \times 10^{12}$ | 1.62±<br>$3.53 \times 10^{11}$ |

**Table S7.** Proportions of PB2\_PB2  $\pi$ - $\pi$  packing pairs with different orders of magnitude in the hole transfer rates for the PB2:BTP-B, PB2:BTP-Bme, and PB2:BTP-Biso blends. Here, “small→large” means hole transfer from a PB2 chain with a smaller IP to one with a larger IP, and “large→small” means the reverse process.

| hole transfer rate<br>[s <sup>-1</sup> ] | PB2:BTP-B       |                 | PB2:BTP-Bme     |                 | PB2:BTP-Biso    |                 |
|------------------------------------------|-----------------|-----------------|-----------------|-----------------|-----------------|-----------------|
|                                          | small→<br>large | large→<br>small | small→<br>large | large→<br>small | small→<br>large | large→<br>small |
| $\geq 10^{13}$                           | 2.08%           |                 | 1.92%           |                 | 3.51%           |                 |
| $\geq 10^{12}$                           | 27.1%           | 2.08%           | 38.5%           | 1.92%           | 33.3%           | 7.02%           |
| $\geq 10^{11}$                           | 54.2%           | 14.6%           | 69.2%           | 28.9%           | 61.4%           | 24.6%           |
| $\geq 10^{10}$                           | 85.4%           | 54.2%           | 86.5%           | 48.1%           | 80.7%           | 61.4%           |
| $\geq 10^9$                              |                 | 79.2%           |                 | 88.5%           |                 | 75.4%           |

**Table S8.** Parameters used to calculate the non-radiative recombination rates,  $k_{nr}$ , for the MD-simulated PB2:BTP-B, PB2:BTP-Bme, and PB2:BTP-Biso blends.

|              | $E_{CT}^{avg}$ (eV) | $ V_{el}^{avg} $ (eV) | $\lambda_{intra}$ (eV) | $\lambda_{inter}$ (eV) | $\omega_{qm}$ (cm <sup>-1</sup> ) |
|--------------|---------------------|-----------------------|------------------------|------------------------|-----------------------------------|
| PB2:BTP-B    | 1.455               | 0.236                 | 0.231                  | 0.1                    | 1200                              |
| PB2:BTP-Bme  | 1.504               | 0.226                 | 0.228                  |                        |                                   |
| PB2:BTP-Biso | 1.521               | 0.220                 | 0.227                  |                        |                                   |

**Table S9.** Parameters used to calculate the radiative recombination rates,  $k_r$ , for the MD-simulated PB2:BTP-B, PB2:BTP-Bme, and PB2:BTP-Biso blends.

|              | $E_{CT}^{ad}$ (eV) | $\mu_{CT \rightarrow S0}$ (D) | $k_r$ (s <sup>-1</sup> ) |
|--------------|--------------------|-------------------------------|--------------------------|
| PB2:BTP-B    | 1.124              | 0.450                         | $2.60 \times 10^5$       |
| PB2:BTP-Bme  | 1.176              | 0.615                         | $4.19 \times 10^5$       |
| PB2:BTP-Biso | 1.194              | 0.561                         | $3.78 \times 10^5$       |

**Table S10.** Intermolecular exciton dissociation rates,  $k_{\text{dis}}$ , for the 17, 6, 92, and 19 A\_end, A\_core, D\_end, and D\_core  $\pi$ - $\pi$  packing pairs, respectively, extracted from the MD-simulated PB2:BTP-Bme blend.

| A_end packing pattern |                             |                              |                                |                                         |
|-----------------------|-----------------------------|------------------------------|--------------------------------|-----------------------------------------|
| pairs                 | $ V_{\text{dis}} $<br>(meV) | $\Delta E_{\text{dis}}$ (eV) | $\lambda_{\text{dis}}$<br>(eV) | $k_{\text{dis}}$ ( $\text{s}^{-1}$ )    |
| 1                     | 24.73                       | -0.837                       | 0.328                          | $8.25 \times 10^9$                      |
| 2                     | 8.54                        | -1.043                       |                                | $5.62 \times 10^5$                      |
| 3                     | 2.83                        | -0.962                       |                                | $1.53 \times 10^6$                      |
| 4                     | 11.73                       | -1.088                       |                                | $1.46 \times 10^5$                      |
| 5                     | 10.95                       | -0.867                       |                                | $6.39 \times 10^8$                      |
| 6                     | 38.27                       | -0.926                       |                                | $1.07 \times 10^9$                      |
| 7                     | 61.78                       | -0.864                       |                                | $2.23 \times 10^{10}$                   |
| 8                     | 5.07                        | -1.169                       |                                | $5.73 \times 10^2$                      |
| 9                     | 3.88                        | -0.827                       |                                | $2.71 \times 10^8$                      |
| 10                    | 28.61                       | -1.057                       |                                | $3.35 \times 10^6$                      |
| 11                    | 2.07                        | -0.973                       |                                | $5.45 \times 10^5$                      |
| 12                    | 4.09                        | -1.018                       |                                | $3.52 \times 10^5$                      |
| 13                    | 7.49                        | -0.973                       |                                | $7.13 \times 10^6$                      |
| 14                    | 12.13                       | -1.066                       |                                | $4.17 \times 10^5$                      |
| 15                    | 4.31                        | -0.800                       |                                | $7.28 \times 10^8$                      |
| 16                    | 22.43                       | -0.876                       |                                | $1.96 \times 10^9$                      |
| 17                    | 5.55                        | -1.026                       |                                | $4.74 \times 10^5$                      |
| Avg.                  | $14.97 \pm 15.45$           | $-0.963 \pm 0.103$           | 0.328                          | $2.07 \times 10^9 \pm 5.40 \times 10^9$ |

| A_core packing pattern |                             |                              |                                |                                               |
|------------------------|-----------------------------|------------------------------|--------------------------------|-----------------------------------------------|
| pairs                  | $ V_{\text{dis}} $<br>(meV) | $\Delta E_{\text{dis}}$ (eV) | $\lambda_{\text{dis}}$<br>(eV) | $k_{\text{dis}}$ ( $\text{s}^{-1}$ )          |
| 1                      | 10.90                       | -1.136                       | 0.328                          | $1.36 \times 10^4$                            |
| 2                      | 7.80                        | -1.153                       |                                | $3.04 \times 10^3$                            |
| 3                      | 32.22                       | -0.953                       |                                | $2.81 \times 10^8$                            |
| 4                      | 9.80                        | -0.889                       |                                | $2.48 \times 10^8$                            |
| 5                      | 25.35                       | -0.984                       |                                | $5.25 \times 10^7$                            |
| 6                      | 20.40                       | -0.630                       |                                | $8.20 \times 10^{11}$                         |
| Avg.                   | $17.74 \pm 8.98$            | $-0.957 \pm 0.175$           | 0.328                          | $1.37 \times 10^{11} \pm 3.05 \times 10^{11}$ |

| D_end packing pattern |  |  |  |  |
|-----------------------|--|--|--|--|
|-----------------------|--|--|--|--|

| pairs | $ V_{\text{dis}} $<br>(meV) | $\Delta E_{\text{dis}}$ (eV) | $\lambda_{\text{dis}}$<br>(eV) | $k_{\text{dis}}$ (s <sup>-1</sup> ) |
|-------|-----------------------------|------------------------------|--------------------------------|-------------------------------------|
| 1     | 16.76                       | -0.862                       | 0.328                          | $1.76 \times 10^9$                  |
| 2     | 9.09                        | -0.982                       |                                | $7.32 \times 10^6$                  |
| 3     | 10.99                       | -1.106                       |                                | $5.61 \times 10^4$                  |
| 4     | 0.99                        | -0.877                       |                                | $3.68 \times 10^6$                  |
| 5     | 4.22                        | -0.975                       |                                | $2.11 \times 10^6$                  |
| 6     | 5.96                        | -1.111                       |                                | $1.32 \times 10^4$                  |
| 7     | 1.53                        | -1.012                       |                                | $6.31 \times 10^4$                  |
| 8     | 1.62                        | -1.036                       |                                | $2.69 \times 10^4$                  |
| 9     | 20.27                       | -1.025                       |                                | $6.47 \times 10^6$                  |
| 10    | 7.88                        | -1.122                       |                                | $1.38 \times 10^4$                  |
| 11    | 5.68                        | -1.151                       |                                | $1.75 \times 10^3$                  |
| 12    | 15.13                       | -0.984                       |                                | $1.90 \times 10^7$                  |
| 13    | 8.64                        | -1.044                       |                                | $5.34 \times 10^5$                  |
| 14    | 10.15                       | -1.193                       |                                | $7.03 \times 10^2$                  |
| 15    | 5.75                        | -0.953                       |                                | $8.87 \times 10^6$                  |
| 16    | 6.32                        | -0.691                       |                                | $2.34 \times 10^{10}$               |
| 17    | 26.01                       | -0.848                       |                                | $6.50 \times 10^9$                  |
| 18    | 7.15                        | -1.010                       |                                | $1.50 \times 10^6$                  |
| 19    | 14.38                       | -0.994                       |                                | $1.15 \times 10^7$                  |
| 20    | 0.23                        | -1.137                       |                                | $5.69 \times 10^0$                  |
| 21    | 10.46                       | -0.821                       |                                | $2.36 \times 10^9$                  |
| 22    | 7.31                        | -1.097                       |                                | $3.78 \times 10^4$                  |
| 23    | 55.33                       | -0.943                       |                                | $1.22 \times 10^9$                  |
| 24    | 1.05                        | -0.998                       |                                | $5.28 \times 10^4$                  |
| 25    | 25.14                       | -0.881                       |                                | $2.12 \times 10^9$                  |
| 26    | 25.02                       | -1.019                       |                                | $1.30 \times 10^7$                  |
| 27    | 14.88                       | -0.843                       |                                | $2.50 \times 10^9$                  |
| 28    | 67.70                       | -0.902                       |                                | $7.72 \times 10^9$                  |
| 29    | 6.00                        | -0.898                       |                                | $6.96 \times 10^7$                  |
| 30    | 20.17                       | -1.272                       |                                | $3.85 \times 10^1$                  |
| 31    | 9.09                        | -0.986                       |                                | $6.26 \times 10^6$                  |
| 32    | 10.78                       | -1.386                       |                                | $1.25 \times 10^{-2}$               |
| 33    | 47.90                       | -0.926                       |                                | $1.68 \times 10^9$                  |
| 34    | 3.79                        | -1.031                       |                                | $1.77 \times 10^5$                  |
| 35    | 22.16                       | -0.931                       |                                | $3.01 \times 10^8$                  |
| 36    | 0.00                        | -1.157                       |                                | $4.94 \times 10^{-4}$               |
| 37    | 32.74                       | -0.862                       |                                | $6.68 \times 10^9$                  |
| 38    | 19.77                       | -0.966                       |                                | $6.40 \times 10^7$                  |

|    |       |        |                       |
|----|-------|--------|-----------------------|
| 39 | 10.23 | -1.016 | $2.45 \times 10^6$    |
| 40 | 4.43  | -0.970 | $2.75 \times 10^6$    |
| 41 | 1.54  | -1.024 | $4.01 \times 10^4$    |
| 42 | 5.28  | -0.982 | $2.51 \times 10^6$    |
| 43 | 2.55  | -1.049 | $3.87 \times 10^4$    |
| 44 | 5.90  | -1.123 | $7.13 \times 10^3$    |
| 45 | 27.33 | -1.006 | $2.66 \times 10^7$    |
| 46 | 58.53 | -0.931 | $2.05 \times 10^9$    |
| 47 | 1.76  | -1.125 | $5.92 \times 10^2$    |
| 48 | 4.14  | -0.796 | $7.66 \times 10^8$    |
| 49 | 12.92 | -1.025 | $2.70 \times 10^6$    |
| 50 | 2.08  | -0.875 | $1.79 \times 10^7$    |
| 51 | 4.65  | -1.109 | $8.79 \times 10^3$    |
| 52 | 6.73  | -0.883 | $1.42 \times 10^8$    |
| 53 | 8.19  | -0.955 | $1.72 \times 10^7$    |
| 54 | 28.85 | -1.100 | $5.04 \times 10^5$    |
| 55 | 3.30  | -1.074 | $2.10 \times 10^4$    |
| 56 | 12.38 | -0.957 | $3.62 \times 10^7$    |
| 57 | 0.85  | -0.964 | $1.27 \times 10^5$    |
| 58 | 12.59 | -1.017 | $3.52 \times 10^6$    |
| 59 | 2.68  | -0.938 | $3.34 \times 10^6$    |
| 60 | 0.97  | -1.438 | $3.53 \times 10^{-6}$ |
| 61 | 33.61 | -0.843 | $1.27 \times 10^{10}$ |
| 62 | 5.40  | -1.001 | $1.24 \times 10^6$    |
| 63 | 11.78 | -0.937 | $6.71 \times 10^7$    |
| 64 | 24.79 | -1.053 | $2.98 \times 10^6$    |
| 65 | 6.96  | -0.808 | $1.51 \times 10^9$    |
| 66 | 23.33 | -0.875 | $2.20 \times 10^9$    |
| 67 | 1.32  | -1.165 | $4.72 \times 10^1$    |
| 68 | 9.04  | -0.981 | $7.56 \times 10^6$    |
| 69 | 2.46  | -1.117 | $1.66 \times 10^3$    |
| 70 | 2.28  | -0.980 | $5.04 \times 10^5$    |
| 71 | 1.92  | -1.126 | $6.57 \times 10^2$    |
| 72 | 11.15 | -1.014 | $3.17 \times 10^6$    |
| 73 | 5.23  | -0.954 | $7.16 \times 10^6$    |
| 74 | 5.90  | -1.036 | $3.61 \times 10^5$    |
| 75 | 15.74 | -0.889 | $6.31 \times 10^8$    |
| 76 | 9.00  | -1.145 | $5.83 \times 10^3$    |
| 77 | 43.71 | -0.794 | $8.97 \times 10^{10}$ |

|      |                   |                    |       |                                            |
|------|-------------------|--------------------|-------|--------------------------------------------|
| 78   | 11.38             | -0.844             |       | $1.41 \times 10^9$                         |
| 79   | 7.40              | -1.252             |       | $1.56 \times 10^1$                         |
| 80   | 5.70              | -0.999             |       | $1.51 \times 10^6$                         |
| 81   | 71.22             | -0.873             |       | $2.21 \times 10^{10}$                      |
| 82   | 17.72             | -0.877             |       | $1.19 \times 10^9$                         |
| 83   | 9.15              | -0.764             |       | $8.62 \times 10^9$                         |
| 84   | 0.57              | -1.002             |       | $1.32 \times 10^4$                         |
| 85   | 11.19             | -1.140             |       | $1.19 \times 10^4$                         |
| 86   | 30.89             | -0.908             |       | $1.29 \times 10^9$                         |
| 87   | 2.75              | -1.004             |       | $2.87 \times 10^5$                         |
| 88   | 23.04             | -1.147             |       | $3.45 \times 10^4$                         |
| 89   | 1.82              | -0.939             |       | $1.48 \times 10^6$                         |
| 90   | 11.59             | -0.947             |       | $4.61 \times 10^7$                         |
| 91   | 1.51              | -1.000             |       | $1.03 \times 10^5$                         |
| 92   | 37.93             | -0.796             |       | $6.43 \times 10^{10}$                      |
| Avg. | $13.41 \pm 14.70$ | $-0.996 \pm 0.127$ | 0.328 | $2.88 \times 10^9 \pm 1.18 \times 10^{10}$ |

| D_core packing pattern |                             |                              |                                |                                     |
|------------------------|-----------------------------|------------------------------|--------------------------------|-------------------------------------|
| pairs                  | $ V_{\text{dis}} $<br>(meV) | $\Delta E_{\text{dis}}$ (eV) | $\lambda_{\text{dis}}$<br>(eV) | $k_{\text{dis}}$ (s <sup>-1</sup> ) |
| 1                      | 7.21                        | -1.035                       | 0.328                          | $5.54 \times 10^5$                  |
| 2                      | 10.52                       | -0.966                       |                                | $1.82 \times 10^7$                  |
| 3                      | 3.12                        | -0.975                       |                                | $1.14 \times 10^6$                  |
| 4                      | 23.18                       | -0.898                       |                                | $1.03 \times 10^9$                  |
| 5                      | 2.83                        | -1.129                       |                                | $1.25 \times 10^3$                  |
| 6                      | 22.33                       | -0.808                       |                                | $1.56 \times 10^{10}$               |
| 7                      | 7.27                        | -1.018                       |                                | $1.12 \times 10^6$                  |
| 8                      | 2.25                        | -1.024                       |                                | $8.31 \times 10^4$                  |
| 9                      | 7.88                        | -0.959                       |                                | $1.33 \times 10^7$                  |
| 10                     | 1.24                        | -1.158                       |                                | $5.95 \times 10^1$                  |
| 11                     | 0.93                        | -1.318                       |                                | $6.01 \times 10^{-3}$               |
| 12                     | 13.92                       | -1.077                       |                                | $3.32 \times 10^5$                  |
| 13                     | 17.62                       | -0.872                       |                                | $1.41 \times 10^9$                  |
| 14                     | 25.57                       | -0.967                       |                                | $1.04 \times 10^8$                  |
| 15                     | 7.36                        | -0.982                       |                                | $4.95 \times 10^6$                  |
| 16                     | 9.29                        | -0.994                       |                                | $4.93 \times 10^6$                  |
| 17                     | 13.68                       | -0.912                       |                                | $2.21 \times 10^8$                  |
| 18                     | 23.43                       | -0.897                       |                                | $1.09 \times 10^9$                  |

|      |                  |                    |       |                                         |
|------|------------------|--------------------|-------|-----------------------------------------|
| 19   | 16.16            | -0.82              |       | $5.96 \times 10^9$                      |
| Avg. | $11.36 \pm 7.89$ | $-0.990 \pm 0.119$ | 0.328 | $1.34 \times 10^9 \pm 3.63 \times 10^9$ |

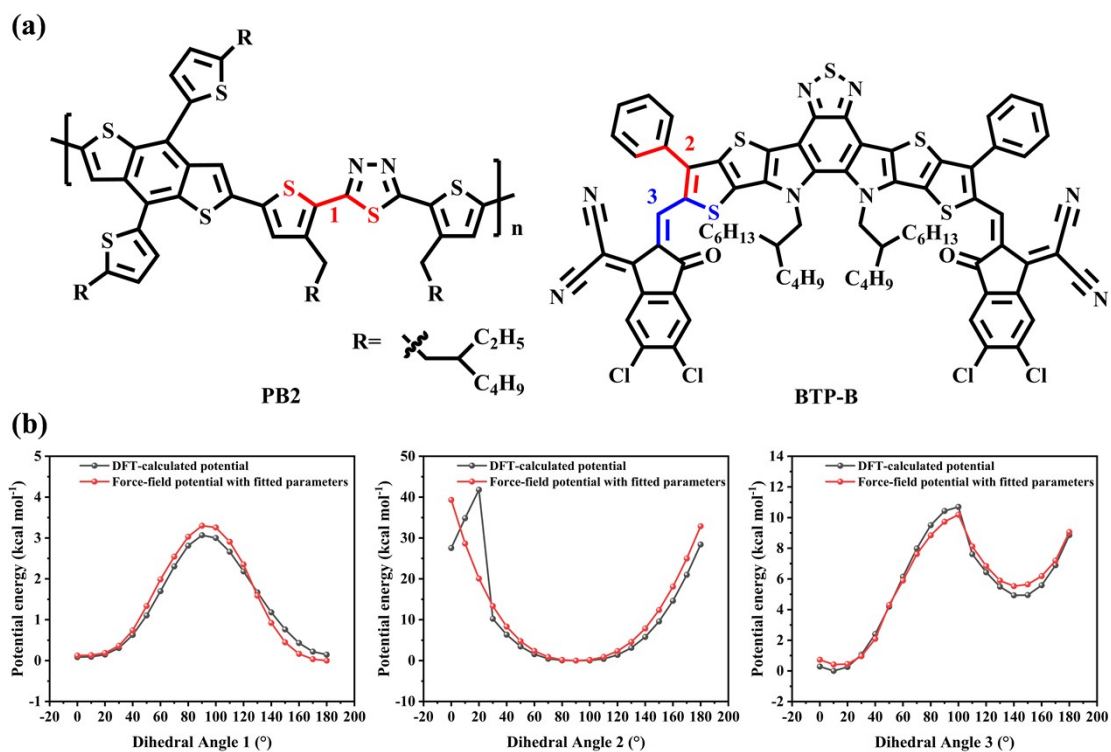

**Figure S5.** (a) Dihedral 1 along the PB2 chain and Dihedral 2 and 3 of acceptor (here, we take BTP-B as an example); (b) comparison of inter-ring torsion potentials calculated at the  $\omega$ B97XD/6-31G(d,p) level and at the OPLS-AA level using the parameters fitted for Dihedral 1, 2, and 3.
